# Supplementary material for: CARTR Plus: the creation of an ART registry in Canada
Source: PubMed Central journal article supplement — Hum Reprod Open. 2020 Jun 6;2020(3):hoaa022. doi: 10.1093/hropen/hoaa022 (PMC7275630; doi:10.1093/hropen/hoaa022), 2020-06-06
Supplement: hoaa022_supplementary_data.pdf [file hoaa022_supplementary_data.pdf]

The definitions used in this document are in agreement with the ones published by Zegers-Hochschild *et al.* The International Glossary on Infertility and Fertility Care, Human Reproduction, Vol. 32, No. 9, pp.1786-1801, 2017

| Data Element                                                   | Definition                                                                                                                                                                                                                                                                                                                                                                | Data Type and Value                                                                 | Justification                      | Field Level Help                                                                                                                                                                                                                                                                                                                                                                                                                                                                    |
|----------------------------------------------------------------|---------------------------------------------------------------------------------------------------------------------------------------------------------------------------------------------------------------------------------------------------------------------------------------------------------------------------------------------------------------------------|-------------------------------------------------------------------------------------|------------------------------------|-------------------------------------------------------------------------------------------------------------------------------------------------------------------------------------------------------------------------------------------------------------------------------------------------------------------------------------------------------------------------------------------------------------------------------------------------------------------------------------|
| <b>Patient Profile</b>                                         |                                                                                                                                                                                                                                                                                                                                                                           |                                                                                     |                                    |                                                                                                                                                                                                                                                                                                                                                                                                                                                                                     |
| <b>ClinicID</b>                                                | Unique number assigned to clinic                                                                                                                                                                                                                                                                                                                                          | Numeric                                                                             | Identify source of data            |                                                                                                                                                                                                                                                                                                                                                                                                                                                                                     |
| <b>Patient name</b><br><b>Family name</b><br><b>Given name</b> | Name of female or male patient who intends to raise the child<br>For donor oocyte/embryo cycles, <b>the oocyte/embryo recipient is the patient</b><br>For same sex male couples, one of the male partners is the patient. A single male can be a patient. For same-sex females sharing eggs, the recipient is the patient and the egg provider is the egg donor/provider. | Text<br><br>Field not available for Non-Ontario clinics due to privacy restrictions | 1 <sup>st</sup> patient identifier | Name of female or male patient who intends to raise the child<br>Family name as it appears on official Health Card<br><br>Given name as it appears on official Health Card<br><br>For donor oocyte/embryo cycles, the oocyte/embryo recipient is the patient<br>For same sex male couples, one of the male partners is the patient. A single male can be a patient. For same-sex females sharing eggs, the recipient is the patient and the egg provider is the egg donor/provider. |
| <b>Patient gender</b>                                          | Gender of the patient                                                                                                                                                                                                                                                                                                                                                     | Sex – Female, Male, Non-Binary                                                      |                                    | Gender of the patient<br>If transgendered, gender as self-identified at the time of cycle start. Some patients do not identify with either gender                                                                                                                                                                                                                                                                                                                                   |

| Data Element                        | Definition                              | Data Type and Value                                                                                                                         | Justification                                                             | Field Level Help                                                                                |
|-------------------------------------|-----------------------------------------|---------------------------------------------------------------------------------------------------------------------------------------------|---------------------------------------------------------------------------|-------------------------------------------------------------------------------------------------|
|                                     |                                         |                                                                                                                                             |                                                                           | (non-binary)                                                                                    |
| <b>Patient DOB</b>                  | Date of birth of patient                | Date                                                                                                                                        | 2 <sup>nd</sup> patient identifier                                        | Date of birth of patient                                                                        |
| <b>Patient health card type</b>     | Type of health card provided by patient | Select one only<br>1. OHIP<br>2. RAMQ<br>3. Other<br>4. None<br><br>Field not available for Non-Ontario clinics due to privacy restrictions |                                                                           | Type of health card provided by patient                                                         |
| <b>Patient Health Card Number</b>   | Health card number of patient           | Numeric<br>Excluding version code<br><br>Field not available for Non-Ontario clinics due to privacy restrictions                            | 3 <sup>rd</sup> patient identifier                                        | Health card number of patient<br>If OHIP number, use 10 digit number and exclude version number |
| <b>Patient address: address</b>     | Residential street address of patient   | Street address<br><br>Field not available for Non-Ontario clinics due to privacy restrictions                                               |                                                                           |                                                                                                 |
| <b>Patient address: city</b>        | Residential city address of patient     | City/town name<br><br>Field not available for Non-Ontario clinics due to privacy restrictions                                               |                                                                           |                                                                                                 |
| <b>Patient address: postal code</b> | Postal code of patient                  | Letters and numbers<br><br>Field not available for Non-Ontario clinics due to privacy                                                       | 4 <sup>th</sup> patient identifier<br>Important for socioeconomic studies |                                                                                                 |

| Data Element                       | Definition                                                      | Data Type and Value                                                                                                                                                               | Justification                                                                                                                                                                   | Field Level Help                                                                                                                                                                                                                                                  |
|------------------------------------|-----------------------------------------------------------------|-----------------------------------------------------------------------------------------------------------------------------------------------------------------------------------|---------------------------------------------------------------------------------------------------------------------------------------------------------------------------------|-------------------------------------------------------------------------------------------------------------------------------------------------------------------------------------------------------------------------------------------------------------------|
|                                    |                                                                 | restrictions                                                                                                                                                                      |                                                                                                                                                                                 |                                                                                                                                                                                                                                                                   |
| <b>Patient address: province</b>   | Province of residence of patient                                | Name of province<br><br>Field not available for Non-Ontario clinics due to privacy restrictions                                                                                   |                                                                                                                                                                                 | You may press "Ctrl+F" to search for a value or keyword                                                                                                                                                                                                           |
| <b>Patient address: country</b>    | Country of residence of patient                                 | Name of country<br><br>Field not available for Non-Ontario clinics due to privacy restrictions                                                                                    |                                                                                                                                                                                 | You may press "Ctrl+F" to search for a value or keyword                                                                                                                                                                                                           |
| <b>Patient chart #</b>             | Patient unique identifier at the clinic level                   | Alpha-Numeric<br><br>For Non-Ontario clinics, no patient identifying information, or parts thereof, can be used (i.e., no patient name, initials, or complete health card number) | 5 <sup>th</sup> patient identifier - to be used when data must be de-identified prior to use<br><br>Note that the same patient might have a different chart # in another clinic | The patient's unique file number assigned by care provider (e.g. chart number, client number)<br><br>For Non-Ontario clinics, no patient identifying information, or parts thereof, can be used (i.e., no patient name, initials, or complete health card number) |
| <b>Patient notes</b>               | Generic text field to document notes related to patient profile | Text<br><br>Field not available for Non-Ontario clinics due to privacy restrictions                                                                                               | The intent is to use this field for notes related to patient profile                                                                                                            | Generic text field to document notes related to patient profile                                                                                                                                                                                                   |
| <b><i>Cycle Details Header</i></b> |                                                                 |                                                                                                                                                                                   |                                                                                                                                                                                 |                                                                                                                                                                                                                                                                   |

| Data Element                                                   | Definition                                                                                                                                                                                                                                | Data Type and Value                                                                                                                                              | Justification                  | Field Level Help                                                                                                                                                                                                                          |
|----------------------------------------------------------------|-------------------------------------------------------------------------------------------------------------------------------------------------------------------------------------------------------------------------------------------|------------------------------------------------------------------------------------------------------------------------------------------------------------------|--------------------------------|-------------------------------------------------------------------------------------------------------------------------------------------------------------------------------------------------------------------------------------------|
| <b>Cycle type</b>                                              | <p>Primary cycle: A cycle that includes an oocyte collection that results in IVF, IVM, or Oocyte banking</p> <p>Secondary cycle: A cycle that does not include an oocyte collection but instead uses thawed oocytes or thawed embryos</p> | <p>Select one only</p> <p>Primary cycle:<br/>IVF<br/>IVM<br/>Oocyte banking</p> <p>Secondary cycle:<br/>Frozen oocyte IVF<br/>FET</p>                            | Link outcomes to type of cycle | <p>Primary cycle: A cycle that includes an oocyte collection that results in IVF, IVM, or Oocyte banking</p> <p>Secondary cycle: A cycle that does not include an oocyte collection but instead uses thawed oocytes or thawed embryos</p> |
| <b>Provincial funding for this cycle</b>                       | Indicates whether or not there is provincial funding for this cycle.                                                                                                                                                                      | Yes or no                                                                                                                                                        |                                | Indicates whether or not there is provincial funding for this cycle.                                                                                                                                                                      |
| <b>If Provincially funded is yes, indicate type of funding</b> | Indicates type of funding or support for this cycle.                                                                                                                                                                                      | <ol style="list-style-type: none"> <li>1. Quebec open funded IVF</li> <li>2. Ontario MoH transfer payment</li> <li>3. Other - specify type of funding</li> </ol> |                                | Indicates type of funding or support for this cycle.                                                                                                                                                                                      |

| Data Element            | Definition                                                                                                                                                                                                                        | Data Type and Value                                                                             | Justification                  | Field Level Help                                                                                                                                                                                                                                                                                                                                                                  |
|-------------------------|-----------------------------------------------------------------------------------------------------------------------------------------------------------------------------------------------------------------------------------|-------------------------------------------------------------------------------------------------|--------------------------------|-----------------------------------------------------------------------------------------------------------------------------------------------------------------------------------------------------------------------------------------------------------------------------------------------------------------------------------------------------------------------------------|
| <b>Cycle ID</b>         | <p>Primary cycle: Unique code used by clinic to identify a single oocyte collection (IVF, IVM or Oocyte banking cycle)</p> <p>Secondary cycle: Unique code used by clinic to identify an FET cycle or Frozen oocyte IVF cycle</p> | Al pha-Numeric                                                                                  |                                | <p>Primary cycle: Unique code used by clinic to identify a single oocyte collection (IVF, IVM or Oocyte banking cycle)</p> <p>Secondary cycle: Unique code used by clinic to identify an FET cycle or Frozen oocyte IVF cycle</p> <p>If no cycle ID is created for a secondary cycle (Frozen oocyte IVF or FET), clinic can choose to use primary cycle ID with – 1,2,3, etc.</p> |
| <b>Cycle start date</b> | <p>Date of first dose of FSH in stimulated cycle or day 1 of cycle (LMP) for cycle with no stimulation</p> <p>For FET cycle or cycle using frozen oocytes, it can be LMP or start of monitoring</p>                               | Date                                                                                            | Link outcomes to calendar year | <p>Date of first dose of FSH in stimulated cycle or day 1 of cycle (LMP) for cycle with no stimulation</p> <p>For FET cycle or cycle using frozen oocytes, it can be LMP or start of monitoring</p>                                                                                                                                                                               |
| <b>Patient age</b>      | Age of patient (female or male) at start of cycle                                                                                                                                                                                 | <p>Numeric</p> <p>Automatically calculated using cycle start date and patient date of birth</p> | Links outcomes to patient age  | Age of patient (female or male) at start of cycle automatically calculated using cycle start date and patient date of birth                                                                                                                                                                                                                                                       |

| Data Element                      | Definition                                                                                                                                                                                                          | Data Type and Value                                                                                                                                                                                          | Justification                                                                                                       | Field Level Help                                                                                                                                                                                                                                                                                                                          |
|-----------------------------------|---------------------------------------------------------------------------------------------------------------------------------------------------------------------------------------------------------------------|--------------------------------------------------------------------------------------------------------------------------------------------------------------------------------------------------------------|---------------------------------------------------------------------------------------------------------------------|-------------------------------------------------------------------------------------------------------------------------------------------------------------------------------------------------------------------------------------------------------------------------------------------------------------------------------------------|
| <b>Simulated primary cycle</b>    | <p>A primary cycle that originally occurred either in another clinic and/or prior to January 1, 2013.</p> <p>A simulated cycle is also used to provide origin for donated oocytes in Frozen Oocyte IVF (FOIVF).</p> | <p>4 data elements:<br/>           Cycle type ((IVF, IVM or Oocyte banking)<br/>           Cycle ID<br/>           Date of oocyte collection<br/>           Age of oocyte provider at time of collection</p> | <p>Allow linkage of secondary cycle(s) such as Frozen oocyte IVF or FET, to a primary cycle (oocyte collection)</p> | <p>A primary cycle that originally occurred either in another clinic and/or prior to January 1, 2013</p> <p>If the date of oocyte collection and/or age of oocyte provider at time of collection are not available, they can be set to unknown but this will limit the cycle's inclusion in analysis based on age of oocyte provider.</p> |
| <b>Origin of simulated cycle</b>  | <p>Text field to document the clinic of origin of the oocytes or embryos</p>                                                                                                                                        | Text                                                                                                                                                                                                         | <p>Allow linkage of secondary cycle(s) such as Frozen oocyte IVF or FET, to a primary cycle (oocyte collection)</p> | <p>Text field to document the clinic of origin of the oocytes or embryos</p>                                                                                                                                                                                                                                                              |
| <b><i>Patient History Tab</i></b> |                                                                                                                                                                                                                     |                                                                                                                                                                                                              |                                                                                                                     |                                                                                                                                                                                                                                                                                                                                           |
| <b>Prior pregnancies</b>          | <p>Number of prior pregnancies for female patient with same or different partner, with or without ART including ectopic pregnancy</p>                                                                               | Numeric                                                                                                                                                                                                      | <p>Link outcomes to number of prior pregnancies</p>                                                                 | <p>Number of prior pregnancies for female patient with same or different partner, with or without ART including ectopic pregnancy</p>                                                                                                                                                                                                     |
| <b>Prior births</b>               | <p>Number of prior births for female patient with same or different partner, with or without ART including stillbirth</p> <p>Birth of more than one baby (multiple birth) is defined as one birth</p>               | Numeric                                                                                                                                                                                                      | <p>Link outcomes to number of prior births</p>                                                                      | <p>Number of prior births for female patient with same or different partner, with or without ART including stillbirth</p> <p>Birth of more than one baby (multiple birth) is defined as one birth</p>                                                                                                                                     |

| Data Element                                          | Definition                                                                                                                                                                                         | Data Type and Value                                                                                                                                                                                                                  | Justification                                                                                         | Field Level Help                                                                                                                                                                                                                                 |
|-------------------------------------------------------|----------------------------------------------------------------------------------------------------------------------------------------------------------------------------------------------------|--------------------------------------------------------------------------------------------------------------------------------------------------------------------------------------------------------------------------------------|-------------------------------------------------------------------------------------------------------|--------------------------------------------------------------------------------------------------------------------------------------------------------------------------------------------------------------------------------------------------|
| <b>Prior fresh cycles started, own oocytes</b>        | Number of prior initiated cycles (starts) for this patient, same clinic or other clinics<br><br>Start defined as FSH received in a stimulated cycle or after monitoring started in a natural cycle | Numeric                                                                                                                                                                                                                              | Link outcomes to number of prior ovarian stimulations                                                 | Number of prior initiated cycles (starts) for this patient, same clinic or other clinics<br><br>Start defined as FSH received in a stimulated cycle or after monitoring started in a natural cycle                                               |
| <b>Prior ETs (fresh or frozen) with own oocytes</b>   | Number of prior ET procedures (fresh or frozen) that patient had with her own oocytes<br><br>ET using a surrogate is excluded                                                                      | Numeric                                                                                                                                                                                                                              | Link outcomes to number of times embryos from own oocytes were transferred in this patient's uterus   | Number of prior ET procedures (fresh or frozen) that patient had with her own oocytes<br><br>ET using a surrogate is excluded                                                                                                                    |
| <b>Prior ETs (fresh or frozen) with donor oocytes</b> | Number of prior ET procedures (fresh or frozen) that patient had with donor oocytes<br><br>ET using a surrogate is excluded                                                                        | Numeric                                                                                                                                                                                                                              | Link outcomes to number of times embryos from donor oocytes were transferred in this patient's uterus | Number of prior ET procedures (fresh or frozen) that patient had with donor oocytes<br><br>ET using a surrogate is excluded                                                                                                                      |
| <b>Reasons for treatment cycle</b>                    | Infertility diagnosis or other reasons for treatment cycle                                                                                                                                         | Select all applicable<br>1. Endometriosis<br>2. Tubal factor<br>3. Diminished ovarian reserve<br>4. Male factor<br>5. No male partner<br>6. Poly Cystic Ovarian Syndrome (PCOS)<br>7. Other ovulatory disorders<br>8. Uterine factor | Link outcomes to original reasons for treatment                                                       | Reasons for treatment cycle<br><br>Select all applicable<br>1. Endometriosis: A condition that involves endometrial tissue that normally lines the uterus growing outside the uterus. Endometriosis often the reproductive organs and may affect |

| Data Element | Definition | Data Type and Value                                                                                                                                                                                                                                                                                                                                                                                                                                                                                                                                                                 | Justification | Field Level Help                                                                                                                                                                                                                                                                                                                                                                                                                                                                                                                                                                                                                                                                                               |
|--------------|------------|-------------------------------------------------------------------------------------------------------------------------------------------------------------------------------------------------------------------------------------------------------------------------------------------------------------------------------------------------------------------------------------------------------------------------------------------------------------------------------------------------------------------------------------------------------------------------------------|---------------|----------------------------------------------------------------------------------------------------------------------------------------------------------------------------------------------------------------------------------------------------------------------------------------------------------------------------------------------------------------------------------------------------------------------------------------------------------------------------------------------------------------------------------------------------------------------------------------------------------------------------------------------------------------------------------------------------------------|
|              |            | 9. Endocrine disorder<br>10. Other female factor<br>11. Gonadotoxic therapy<br>12. Oocyte banking-for non-cancer/non-medical treatment reasons including donation to commercial egg bank<br>13. Oocyte banking-cancer and other medical treatment<br>14. Embryo banking-for non-cancer/non-medical treatment reasons<br>15. Embryo banking-cancer and other medical treatment<br>16. PGT-M/SR for known genetic factor<br>17. PGT-A<br>18. Unexplained infertility<br>19. No female partner<br>20. Advanced maternal (age 35 or older)<br>21. Peritoneal factor or severe adhesions |               | fertility<br>2. Tubal factor: A condition where the fallopian tubes are blocked or damaged. Common causes include infection, surgery, endometriosis, ectopic pregnancy and tubal ligation.<br>3. Diminished ovarian reserve: Determined by assessment of ovarian reserve tests e.g., antral follicle count (AFC), day 3 FSH and/or anti-mullerian hormone (AMH) +/- patient age<br>4. Male factor: A condition that is characterized by problems with male ability to produce or deliver sperm, inadequate or abnormal sperm<br>5. No male partner: No partner to provide sperm. Would apply to single female patient or same-sex female couple<br>6. PCOS: A condition characterized by at least 2 of these 3 |



| Data Element | Definition | Data Type and Value | Justification | Field Level Help                                                                                                                                                                                                                                                                                                                                                                                                                                                                                                                                                                                                                                                                                                                                             |
|--------------|------------|---------------------|---------------|--------------------------------------------------------------------------------------------------------------------------------------------------------------------------------------------------------------------------------------------------------------------------------------------------------------------------------------------------------------------------------------------------------------------------------------------------------------------------------------------------------------------------------------------------------------------------------------------------------------------------------------------------------------------------------------------------------------------------------------------------------------|
|              |            |                     |               | <p>characteristics: (1) Oligo- and/or anovulation; (2) Clinical and/or biochemical signs of hyperandrogenism; or (3) Polycystic ovaries and exclusion of other aetiologies (congenital adrenal hyperplasia, androgen-secreting tumours, Cushing's syndrome. Rotterdam Criteria - Hum. Reprod. (2004) 19 (1): 41-47.</p> <p>7. Other ovulatory disorders: Conditions whereby a female patient fails to ovulate regularly or the absence of ovulation other than PCOS</p> <p>8. Other uterine factor: Conditions of the uterus that affect fertility such as but not limited to fibroids, cavitory scarring, structural abnormalities, polyps adenomyosis, or absence of the uterus</p> <p>9. Endocrine Disorder – Disorders related to hormone production</p> |

| Data Element | Definition | Data Type and Value | Justification | Field Level Help                                                                                                                                                                                                                                                                                                                                                                                                                                                                                                                                                                                                                                                                                                        |
|--------------|------------|---------------------|---------------|-------------------------------------------------------------------------------------------------------------------------------------------------------------------------------------------------------------------------------------------------------------------------------------------------------------------------------------------------------------------------------------------------------------------------------------------------------------------------------------------------------------------------------------------------------------------------------------------------------------------------------------------------------------------------------------------------------------------------|
|              |            |                     |               | <p>(increase or decrease).</p> <p>10. Other female factor: Any fertility factor not described above</p> <p>11. Gonadotoxic therapy: Previous exposure to drugs that cause destruction of ovarian tissue or the ability of the ovaries to produce oocytes other than cancer therapy</p> <p>12. Oocyte banking- for non-cancer/medical treatment reasons: Oocytes are cryopreserved for future use for non-cancer/medical reasons also termed 'deferred reproduction'. Oocyte donation to commercial egg bank is recorded here.</p> <p>13. Oocyte banking-cancer and other medical treatment: Patient is about to undergo cancer or other medical treatment that can/will negatively affect fertility/cause sterility</p> |

| Data Element | Definition | Data Type and Value | Justification | Field Level Help                                                                                                                                                                                                                                                                                                                                                                                                                                                                                                                                                                                                                                                                                 |
|--------------|------------|---------------------|---------------|--------------------------------------------------------------------------------------------------------------------------------------------------------------------------------------------------------------------------------------------------------------------------------------------------------------------------------------------------------------------------------------------------------------------------------------------------------------------------------------------------------------------------------------------------------------------------------------------------------------------------------------------------------------------------------------------------|
|              |            |                     |               | <p>14. Embryo banking- for non-cancer/medical treatment reasons: Deferred reproduction for other than cancer therapy e.g., military deployment, individual choice</p> <p>15. Embryo banking-cancer and other medical treatment: Embryos are created and cryopreserved prior to the commencement of treatment for cancer/medical illness that can/will affect future fertility</p> <p>16. PGT-M/SR for known genetic factor: Pre-implantation Genetic Testing for known genetic factor (M- monogenic/single gene defect; SR – chromosomal; structural rearrangement) whereby each embryo is tested for genetic abnormality(ies) in order to exclude these embryos from transfer to the uterus</p> |

| Data Element | Definition | Data Type and Value | Justification | Field Level Help                                                                                                                                                                                                                                                                                                                                                                                                                                                                                                                                                                                                                                                                                                                                                    |
|--------------|------------|---------------------|---------------|---------------------------------------------------------------------------------------------------------------------------------------------------------------------------------------------------------------------------------------------------------------------------------------------------------------------------------------------------------------------------------------------------------------------------------------------------------------------------------------------------------------------------------------------------------------------------------------------------------------------------------------------------------------------------------------------------------------------------------------------------------------------|
|              |            |                     |               | <p>17. PGT-A Pre-implantation Genetic Testing – A (aneuploidy) to determine that the embryo has a normal number of chromosomes to detect aneuploidy prior to transfer. May also be called Comprehensive Chromosome Screening (CCS) or Pre-Implantation Genetic Screening (PGS).</p> <p>18. Unexplained infertility: A general term to refer to patients where no cause for infertility can be determined</p> <p>19. No female partner: No female partner to carry the fetus. Would apply to single male patient or same-sex male couple.</p> <p>20. Advanced maternal age: Women 35 years of age and older</p> <p>21. Peritoneal factor or severe adhesions: A condition in which there is scarring or adhesions in the peritoneal cavity often due to previous</p> |

| Data Element                   | Definition                                                                                                                              | Data Type and Value                                                                                                                                                                                                                                                                                                                                                                                                                                                                                                                | Justification                                                   | Field Level Help                                                                            |
|--------------------------------|-----------------------------------------------------------------------------------------------------------------------------------------|------------------------------------------------------------------------------------------------------------------------------------------------------------------------------------------------------------------------------------------------------------------------------------------------------------------------------------------------------------------------------------------------------------------------------------------------------------------------------------------------------------------------------------|-----------------------------------------------------------------|---------------------------------------------------------------------------------------------|
|                                |                                                                                                                                         |                                                                                                                                                                                                                                                                                                                                                                                                                                                                                                                                    |                                                                 | infection or surgery resulting                                                              |
| <b>Reasons for male factor</b> | Detailed male factor(s) related to reasons for treatment cycle<br><br>Required if male factor is one of the reasons for treatment cycle | Select all applicable<br>1. Aspermia (no semen)<br>2. Azoospermia<br>3. Oligozoospermia<br>4. Oligoasthenoteratozoospermia (OAT)<br>5. Asthenozoospermia<br>6. Asthenoteratozoospermia<br>7. Hypospermia<br>8. Teratozoospermia<br>9. Globozoospermia<br>10. Necrozoospermia<br>11. High Sperm DNA Fragmentation<br>12. Retrograde Ejaculation<br>13. Erectile Dysfunction<br>14. Sperm Antibodies<br>15. Klinefelter Syndrome<br>16. Sperm banking-cancer treatment<br>17. Known genetic factor<br>18. Not specified<br>19. Other | Give details on the reasons for male factor                     | Detailed male factor(s) related to reasons for treatment cycle<br><br>Select all applicable |
| <b>Patient history notes</b>   | Generic text field to document notes related to this cycle                                                                              | Text<br><br>Field not available for Non-Ontario clinics due to privacy restrictions                                                                                                                                                                                                                                                                                                                                                                                                                                                | The intent is to use this field for notes related to this cycle | Generic text field to document notes related to this cycle                                  |

| Data Element                                | Definition                                                                                                         | Data Type and Value                                                                                                              | Justification                                               | Field Level Help                                                                                                                                                                                                                                                                                                  |
|---------------------------------------------|--------------------------------------------------------------------------------------------------------------------|----------------------------------------------------------------------------------------------------------------------------------|-------------------------------------------------------------|-------------------------------------------------------------------------------------------------------------------------------------------------------------------------------------------------------------------------------------------------------------------------------------------------------------------|
| <b>Stimulation Tab (primary cycle only)</b> |                                                                                                                    |                                                                                                                                  |                                                             |                                                                                                                                                                                                                                                                                                                   |
| <b>Age</b>                                  | Patient age at oocyte collection when using own oocytes or donor age at oocyte collection when using donor oocytes | Numeric                                                                                                                          | Link outcomes to age of oocyte provider                     | Patient age at oocyte collection when using own oocytes or donor age at oocyte collection when using donor oocytes<br>Range 10-55<br><br>There is the ability to set the age to unknown if not available for donor oocytes but this will limit the cycle's inclusion in analysis based on age of oocyte provider. |
| <b>Height</b>                               | Height of oocyte provider                                                                                          | Numeric (cm)                                                                                                                     |                                                             | Height of oocyte provider<br>Must be reported in cm<br>Must be between 90cm and 240cm                                                                                                                                                                                                                             |
| <b>Weight</b>                               | Weight of oocyte provider                                                                                          | Numeric with decimal (kg)                                                                                                        |                                                             | Weight of oocyte provider<br>Must be reported in kg<br>Must be between 25kg and 227kg                                                                                                                                                                                                                             |
| <b>BMI</b>                                  | BMI of oocyte provider                                                                                             | Numeric with decimal (kg/m <sup>2</sup> )<br><br>If height (cm) and weight (kg) are entered, system will calculate automatically | Link outcomes to BMI of oocyte provider                     | Body Mass Index (in kg/m <sup>2</sup> ) of oocyte provider<br>If height (cm) and weight (kg) are entered, system will calculate automatically                                                                                                                                                                     |
| <b>FSH Day 2-4</b>                          | FSH level on day 2-4 of menstrual cycle of oocyte provider                                                         | Numeric with decimal (IU/L)<br><br>Enter the value closest to this cycle                                                         | Marker of ovarian function<br>Predictor of ovarian response | FSH level on day 2-4 of menstrual cycle of oocyte provider<br>If multiple values available use                                                                                                                                                                                                                    |

| Data Element                        | Definition                                                                                                                                                                                                                                                                                                                                                                                                                                                                                                                                                                                                              | Data Type and Value                                                                                                                                                                                           | Justification                                                                                                                                              | Field Level Help                                                                                                                                                           |
|-------------------------------------|-------------------------------------------------------------------------------------------------------------------------------------------------------------------------------------------------------------------------------------------------------------------------------------------------------------------------------------------------------------------------------------------------------------------------------------------------------------------------------------------------------------------------------------------------------------------------------------------------------------------------|---------------------------------------------------------------------------------------------------------------------------------------------------------------------------------------------------------------|------------------------------------------------------------------------------------------------------------------------------------------------------------|----------------------------------------------------------------------------------------------------------------------------------------------------------------------------|
|                                     |                                                                                                                                                                                                                                                                                                                                                                                                                                                                                                                                                                                                                         |                                                                                                                                                                                                               |                                                                                                                                                            | highest value                                                                                                                                                              |
| <b>AFC</b>                          | Antral Follicle Count (AFC) of oocyte provider                                                                                                                                                                                                                                                                                                                                                                                                                                                                                                                                                                          | Numeric                                                                                                                                                                                                       | Marker of ovarian function<br>Predictor of ovarian response                                                                                                | Antral Follicle Count (AFC) of oocyte provider                                                                                                                             |
| <b>AMH level</b>                    | Anti-Mullerian Hormone level of oocyte provider                                                                                                                                                                                                                                                                                                                                                                                                                                                                                                                                                                         | Numeric with decimal: Choose applicable values:<br>1. Ng/ml<br>2. Pmol/L                                                                                                                                      | Marker of ovarian function<br>Predictor of ovarian response                                                                                                | Anti-Mullerian Hormone level of oocyte provider<br>Indicate applicable value for this lab test either ng/ml or pmol/L                                                      |
| <b>Type of stimulation protocol</b> | Ovarian stimulation protocol received by oocyte provider. In a donor oocyte cycle, the protocol is the one received by the donor and not recipient. Select one only:<br>1. <b>Natural cycle:</b> Oocyte collection from the ovaries during a natural menstrual cycle. No medications<br>2. <b>Modified natural cycle:</b> Oocyte collection during a natural menstrual cycle but drugs (GnRH-antagonist) administered to block spontaneous LH surge and (FSH) to maintain follicular growth. Examples of medications used: Cetrorelix acetate (Cetrotide), Ganirelix acetate (Orgulatan)<br>3. <b>Mild stimulation:</b> | Select one only<br>1. Natural cycle<br>2. Modified natural cycle<br>3. Mild stimulation<br>4. Antagonist<br>5. Long agonist<br>6. Flare agonist<br>7. Micro dose flare agonist<br>8. IVM protocol<br>9. Other | Link outcomes to controlled ovarian stimulation regimen<br><br>Note: Any previous instances of 'Antagonist poor responder' will be updated to 'Antagonist' | Ovarian stimulation protocol received by oocyte provider. In a donor oocyte cycle, the protocol is the one received by the donor and not recipient.<br><br>Select one only |

| Data Element | Definition                                                                                                                                                                                                                                                                                                                                                                                                                                                                                                                                                                                                                                                                                                                                                              | Data Type and Value | Justification | Field Level Help |
|--------------|-------------------------------------------------------------------------------------------------------------------------------------------------------------------------------------------------------------------------------------------------------------------------------------------------------------------------------------------------------------------------------------------------------------------------------------------------------------------------------------------------------------------------------------------------------------------------------------------------------------------------------------------------------------------------------------------------------------------------------------------------------------------------|---------------------|---------------|------------------|
|              | <p>Stimulation with lower dose gonadotropins (Long GnRH-agonist protocol) and/or other compounds to limit the number of oocytes to fewer than seven. Examples of medications used: Lower doses of: Leuprolide acetate (Lupron), Goserelin acetate (Zoladex), Buserelin acetate (Suprefact)</p> <p>4. <b>Antagonist:</b> GnRH-antagonist protocol used in normal or poor responders. Examples of medications used: Cetrorelix acetate (Cetrotide), Ganirelix acetate (Orgulatan)</p> <p>5. <b>Long agonist:</b> Long GnRH-agonist protocol started in the mid-luteal phase of the preceding cycle. Examples of medications used: Leuprolide acetate (Lupron), Goserelin acetate (Zoladex), Buserelin acetate (Suprefact)</p> <p>6. <b>Flare agonist:</b> Short GnRH-</p> |                     |               |                  |



| Data Element                                          | Definition                                                                                                                                                                                                                                                                                                                                                                                                                                                                                                                                                                                                | Data Type and Value                                                              | Justification                                           | Field Level Help                                                     |
|-------------------------------------------------------|-----------------------------------------------------------------------------------------------------------------------------------------------------------------------------------------------------------------------------------------------------------------------------------------------------------------------------------------------------------------------------------------------------------------------------------------------------------------------------------------------------------------------------------------------------------------------------------------------------------|----------------------------------------------------------------------------------|---------------------------------------------------------|----------------------------------------------------------------------|
|                                                       | <p>agonist protocol in which injection of gonadotropins is commenced a few days after the start of GnRH agonist. Examples of medications used: Leuprolide acetate (Lupron), Goserelin acetate (Zoladex), Buserelin acetate (Suprefact)</p> <p>7. <b>Micro dose flare agonist:</b> Short GnRH –agonist protocol using a micro-dose of GnRH -agonist. Examples of medications used: Leuprolide acetate (Lupron), Goserelin acetate (Zoladex), Buserelin acetate (Suprefact)</p> <p>8. <b>IVM protocol:</b> Protocol designed to collect immature oocytes for in vitro maturation</p> <p>9. <b>Other</b></p> |                                                                                  |                                                         |                                                                      |
| <b>Other type of stimulation protocol description</b> | Description of other type of stimulation protocol used in this cycle                                                                                                                                                                                                                                                                                                                                                                                                                                                                                                                                      | Text<br><br>Applicable if “other” is selected for “type of stimulation protocol” | Link outcomes to controlled ovarian stimulation regimen | Description of other type of stimulation protocol used in this cycle |

| Data Element              | Definition                                                                                                                                                                                                                                                                                                                                                                                                                                                                                                                                                                                                                                                                                                                                                                                                                                                                                   | Data Type and Value                                                                                                                                                                                                                                                                                                                                                                       | Justification                               | Field Level Help                                                                                                                                                                                                                                                                                                                                                                                                                                                                                                                                                                                                                                                                                                                                                                                                                                                                             |
|---------------------------|----------------------------------------------------------------------------------------------------------------------------------------------------------------------------------------------------------------------------------------------------------------------------------------------------------------------------------------------------------------------------------------------------------------------------------------------------------------------------------------------------------------------------------------------------------------------------------------------------------------------------------------------------------------------------------------------------------------------------------------------------------------------------------------------------------------------------------------------------------------------------------------------|-------------------------------------------------------------------------------------------------------------------------------------------------------------------------------------------------------------------------------------------------------------------------------------------------------------------------------------------------------------------------------------------|---------------------------------------------|----------------------------------------------------------------------------------------------------------------------------------------------------------------------------------------------------------------------------------------------------------------------------------------------------------------------------------------------------------------------------------------------------------------------------------------------------------------------------------------------------------------------------------------------------------------------------------------------------------------------------------------------------------------------------------------------------------------------------------------------------------------------------------------------------------------------------------------------------------------------------------------------|
| <b>Medication for COS</b> | <p>Medication received by oocyte provider for controlled ovarian stimulation (COS)</p> <ol style="list-style-type: none"> <li>None – no drugs administered</li> <li>Clomiphene citrate – e.g., Clomid, Serophene</li> <li>Aromatase inhibitor – e.g., Femara, Letrozole</li> <li>OCP – e.g., Marvelon</li> <li>Estrogen (e.g., patch, oral) – e.g., Estradot, Climara, Estrace</li> <li>hMG – e.g., Repronex</li> <li>HP-hMG – e.g., Menopur</li> <li>rec-FSH – e.g., Gonal-f, Puregon</li> <li>u-FSH – e.g., Bravelle</li> <li>hr-FSH – e.g., Rekovelle</li> <li>rec-LH – e.g., Luveris</li> <li>u-hCG – e.g., Pregnyl, hCG 10,000 (PPC)</li> <li>rec-hCG – e.g., Ovidrel</li> <li>Other – other medications not mentioned in this list</li> <li>Research Study – Information Blinded</li> </ol> <p>Note: Agonist or antagonist drugs are included under “Type of Stimulation Protocol”</p> | <p>Select all applicable</p> <ol style="list-style-type: none"> <li>None</li> <li>Clomiphene citrate</li> <li>Aromatase inhibitor</li> <li>OCP</li> <li>Estrogen (e.g., patch, oral)</li> <li>hMG</li> <li>HP-hMG</li> <li>rec-FSH</li> <li>u-FSH</li> <li>hr-FSH</li> <li>rec-LH</li> <li>u-hCG</li> <li>rec-hCG</li> <li>Other</li> <li>Research Study – Information Blinded</li> </ol> | <p>Link outcomes to medication received</p> | <p>Medication received by oocyte provider for controlled ovarian stimulation (COS)</p> <ol style="list-style-type: none"> <li>None – no drugs administered</li> <li>Clomiphene citrate – e.g., Clomid, Serophene</li> <li>Aromatase inhibitor – e.g., Femara, Letrozole</li> <li>OCP – e.g., Marvelon</li> <li>Estrogen (e.g., patch, oral) – e.g., Estradot, Climara, Estrace</li> <li>hMG – e.g., Repronex</li> <li>HP-hMG – e.g., Menopur</li> <li>rec-FSH – e.g., Gonal-f, Puregon</li> <li>u-FSH – e.g., Bravelle</li> <li>hr-FSH – e.g., Rekovelle</li> <li>rec-LH – e.g., Luveris</li> <li>u-hCG – e.g., Pregnyl, hCG 10,000 (PPC)</li> <li>rec-hCG – e.g., Ovidrel</li> <li>Other – other medications not mentioned in this list</li> <li>Research Study – Information Blinded</li> </ol> <p>Note: Agonist or antagonist drugs are included under “Type of Stimulation Protocol”</p> |

| Data Element                                 | Definition                                                                             | Data Type and Value                                                                                                                                                                                                                                                                                                                | Justification                        | Field Level Help                                                                                                                                     |
|----------------------------------------------|----------------------------------------------------------------------------------------|------------------------------------------------------------------------------------------------------------------------------------------------------------------------------------------------------------------------------------------------------------------------------------------------------------------------------------|--------------------------------------|------------------------------------------------------------------------------------------------------------------------------------------------------|
| <b>Other medication for COS description</b>  | Description of other medications used for COS in this cycle                            | Text<br>Applicable if “other” is selected for “medication for COS”                                                                                                                                                                                                                                                                 | Link outcomes to medication received | Description of other medications used for COS in this cycle                                                                                          |
| <b>Adjuvant medication</b>                   | Medication received by oocyte provider to modify the effect of the gonadotropins       | Select all applicable<br>1. Growth Hormone<br>2. DHEA<br>3. CoQ10<br>4. Steroid (dexamethasone, prednisone, decadron)<br>5. Sildenafil<br>6. Thyroid medication (topical, patch)<br>7. Testosterone patch<br>8. Aspirin<br>9. Metformin<br>10. Dopamine Receptor Agonist (cabergoline, dostinex, cabaser)<br>11. Other<br>12. None | Link outcomes to medication received | Medication received by oocyte provider to modify the effect of the gonadotropins<br><br>Select all applicable                                        |
| <b>Other adjuvant medication description</b> | Description of other adjuvant medications used in this cycle                           | Text<br>Applicable if “other” is selected for “adjuvant medication”                                                                                                                                                                                                                                                                | Link outcomes to medication received | Description of other adjuvant medications used in this cycle                                                                                         |
| <b>Trigger medication</b>                    | Medication received by oocyte provider to complete oocyte maturation before collection | Select one only<br>1. u-hCG<br>2. rec-hCG<br>3. GnRH agonist<br>4. rec-hCG + GnRH agonist<br>5. u-hCG + GnRH agonist                                                                                                                                                                                                               | Link outcomes to medication received | Medication received by oocyte provider to complete oocyte maturation before collection<br><br>If more than one medication is used, enter “other” and |

| Data Element                                | Definition                                                                                                                                                | Data Type and Value                                                                                                                     | Justification                                     | Field Level Help                                                                                    |
|---------------------------------------------|-----------------------------------------------------------------------------------------------------------------------------------------------------------|-----------------------------------------------------------------------------------------------------------------------------------------|---------------------------------------------------|-----------------------------------------------------------------------------------------------------|
|                                             |                                                                                                                                                           | 6. None<br>7. Other<br><br>If more than one medication is used, enter “other” and describe under “other trigger medication description” |                                                   | describe under “other trigger medication description”                                               |
| <b>Other trigger medication description</b> | Description of other trigger medications used in this cycle                                                                                               | Text<br><br>Applicable if “other” is selected for “trigger medication”                                                                  | Link outcomes to medication received              | Description of other trigger medications used in this cycle                                         |
| <b>No. of days of gonadotropins</b>         | Number of days of stimulation from 1 <sup>st</sup> day of FSH to trigger day or day of cancellation                                                       | Numeric                                                                                                                                 | Link outcomes to medication received              | Number of days of stimulation from 1 <sup>st</sup> day of FSH to trigger day or day of cancellation |
| <b>Total dose of FSH</b>                    | Total IU of FSH received in cycle – does not include dose of LH                                                                                           | Numeric (IU) include values for IU                                                                                                      | Link outcomes to medication received              | Total IU of FSH received in cycle – does not include dose of LH                                     |
| <b>Total dose of FSH Rekovelle in mcg</b>   | Total mcg dose of Rekovelle FSH received in cycle – does not include dose of LH.<br><br>*Conversion to IU is not available and must be stored distinctly. | Numeric (mcg)                                                                                                                           | Link outcomes to medication received              | Total mcg of Rekovelle FSH received in cycle – does not include dose of LH.                         |
| <b>Total dose of LH</b>                     | Total dose of LH in IU                                                                                                                                    | Numeric in IU                                                                                                                           | Link outcomes to medication received              | Total dose of LH in IU                                                                              |
| <b># of follicles &lt;15mm</b>              | Number of small, growing follicles (<15mm) at trigger or cancellation                                                                                     | Numeric                                                                                                                                 | Marker of ovarian response to stimulation regimen | Number of small, growing follicles (<15mm) at trigger or cancellation                               |
| <b># of follicles ≥15mm</b>                 | Number of large, growing follicles (≥15 mm) at trigger or                                                                                                 | Numeric                                                                                                                                 | Marker of ovarian response to stimulation regimen | Number of large, growing follicles (≥15 mm) at trigger or                                           |

| Data Element                             | Definition                                                                                                                                  | Data Type and Value                                                                                                                                                                                                              | Justification                                     | Field Level Help                                                                                                                                                                                                                   |
|------------------------------------------|---------------------------------------------------------------------------------------------------------------------------------------------|----------------------------------------------------------------------------------------------------------------------------------------------------------------------------------------------------------------------------------|---------------------------------------------------|------------------------------------------------------------------------------------------------------------------------------------------------------------------------------------------------------------------------------------|
|                                          | cancellation                                                                                                                                |                                                                                                                                                                                                                                  |                                                   | cancellation                                                                                                                                                                                                                       |
| <b>Estradiol level</b>                   | Serum Estradiol value within one day of trigger or cancellation                                                                             | Numeric with decimal (pmol/L)                                                                                                                                                                                                    | Marker of ovarian response to stimulation regimen | Serum Estradiol value within one day of trigger or cancellation                                                                                                                                                                    |
| <b>Progesterone level</b>                | Serum Progesterone value within one day of trigger or cancellation                                                                          | Numeric with decimal (nmol/L)                                                                                                                                                                                                    | Marker of ovarian response to stimulation regimen | Serum Progesterone value within one day of trigger or cancellation                                                                                                                                                                 |
| <b>Endometrial thickness Fresh cycle</b> | Thickness of endometrium within a few days of trigger or cancellation                                                                       | Numeric with decimal (mm)<br><br>Does not apply when donor oocytes are used or when “freeze-all cycle” is intended, the recipient endometrial thickness is entered in the “transfer” tab                                         | Marker of uterine receptivity                     | Thickness of endometrium within a few days of trigger or cancellation<br><br>Does not apply when donor oocytes are used or if a freeze-all cycle is intended, the recipient endometrial thickness is entered in the “transfer” tab |
| <b>Cycle cancelled before retrieval</b>  | Cycle in which ovarian stimulation or monitoring has been carried out with the intention to treat, but did not proceed to oocyte collection | Yes or no                                                                                                                                                                                                                        | Capture all initiated cycles for patient          | Cycle in which ovarian stimulation or monitoring has been carried out with the intention to treat, but did not proceed to oocyte collection                                                                                        |
| <b>Reason cancelled</b>                  | Reason for cancellation of oocyte collection                                                                                                | Select all applicable<br>1. Patient illness<br>2. Patient personal reason<br>3. Patient error<br>4. Low ovarian response<br>5. High ovarian response<br>6. Premature ovulation<br>7. Premature luteinisation<br>8. Donor illness | Explain cancellation of oocyte collection         | Reason for cancellation of oocyte collection<br><br>Select all applicable                                                                                                                                                          |

| Data Element                                                         | Definition                                                                                          | Data Type and Value                                                                                    | Justification                                                                          | Field Level Help                                                                                                                                                                 |
|----------------------------------------------------------------------|-----------------------------------------------------------------------------------------------------|--------------------------------------------------------------------------------------------------------|----------------------------------------------------------------------------------------|----------------------------------------------------------------------------------------------------------------------------------------------------------------------------------|
|                                                                      |                                                                                                     | 9. Donor personal reason<br>10. Donor error<br>11. No access to ovaries<br>12. Other                   |                                                                                        |                                                                                                                                                                                  |
| <b>Other reason cancelled description</b>                            | Description of other reasons for cancellation of oocyte collection                                  | Text<br><br>Applicable if “other” is selected for “reason cancelled”                                   | Explain cancellation of oocyte collection                                              | Description of other reasons for cancellation of oocyte collection                                                                                                               |
| <b>Stimulation notes</b>                                             | Generic text field to document notes related to stimulation of oocyte provider                      | Text<br><br>For Non-Ontario clinics, no patient identifying information, or parts thereof, can be used | The intent is to use this field for notes related to stimulation of oocyte provider    | Generic text field to document notes related to stimulation of oocyte provider<br><br>For Non-Ontario clinics, no patient identifying information, or parts thereof, can be used |
| <b><i>Oocyte &amp; Sperm Collection Tab (primary cycle only)</i></b> |                                                                                                     |                                                                                                        |                                                                                        |                                                                                                                                                                                  |
| <b>Oocyte collection date</b>                                        | Date of oocyte collection                                                                           | Date                                                                                                   | Link outcomes to calendar year<br>Used to calculate ET day (i.e. day 2, 3, 4, 5, or 6) | Date of oocyte collection                                                                                                                                                        |
| <b>Oocyte thaw date</b>                                              | Date of oocyte thawing/warming                                                                      | Date                                                                                                   | Link outcomes to calendar year<br>Used to calculate ET day (i.e. day 2, 3, 4, 5, or 6) | Date of oocyte thawing/warming                                                                                                                                                   |
| <b>Freeze ID #1 of thawed oocytes</b>                                | Unique code originally assigned to the oocyte cohort at freezing<br><br>For frozen oocytes received | Alpha-Numeric                                                                                          | For traceability purposes                                                              | Unique code originally assigned to the oocyte cohort at freezing<br><br>For frozen oocytes received                                                                              |

| Data Element                           | Definition                                                                                                                                                                                                                               | Data Type and Value                                                                                                                                                                                                                                               | Justification                                             | Field Level Help                                                                                                                                                                                                                         |
|----------------------------------------|------------------------------------------------------------------------------------------------------------------------------------------------------------------------------------------------------------------------------------------|-------------------------------------------------------------------------------------------------------------------------------------------------------------------------------------------------------------------------------------------------------------------|-----------------------------------------------------------|------------------------------------------------------------------------------------------------------------------------------------------------------------------------------------------------------------------------------------------|
|                                        | from another clinic, code given by the receiving clinic to that cohort of oocytes                                                                                                                                                        |                                                                                                                                                                                                                                                                   |                                                           | from another clinic, code given by the receiving clinic to that cohort of oocytes                                                                                                                                                        |
| <b>Freeze ID #2 of thawed oocytes</b>  | <p>Unique code originally assigned to the oocyte cohort at freezing if two oocyte cohorts are used at same time</p> <p>For frozen oocytes received from another clinic, code given by the receiving clinic to that cohort of oocytes</p> | Alpha-Numeric                                                                                                                                                                                                                                                     | For traceability purposes                                 | <p>Unique code originally assigned to the oocyte cohort at freezing if two oocyte cohorts are used at same time</p> <p>For frozen oocytes received from another clinic, code given by the receiving clinic to that cohort of oocytes</p> |
| <b>Oocyte origin</b>                   | Origin of the oocytes to be used                                                                                                                                                                                                         | Select all applicable <ol style="list-style-type: none"> <li>1. Fresh own oocytes</li> <li>2. Frozen own oocytes</li> <li>3. Fresh partner oocytes</li> <li>4. Frozen partner oocytes</li> <li>5. Fresh donor oocytes</li> <li>6. Frozen donor oocytes</li> </ol> | Link outcomes to origin of oocytes used to create embryos | Origin of the oocytes to be used. Choose partner oocytes when same-sex female partner provides oocytes for same-sex partner to be the embryo recipient                                                                                   |
| <b>Oocyte donor/provider ID Code #</b> | Unique code to identify the oocyte donor/provider if not 'own' oocytes                                                                                                                                                                   | Alpha-Numeric<br><br>For non-Ontario clinics, no patient identifying information, or parts thereof, can be used (i.e., no patient name, initials, or complete health card number)                                                                                 | Link outcomes to origin of oocytes used to create embryos | Unique code to identify the oocyte donor/provider                                                                                                                                                                                        |

| Data Element                            | Definition                                                                                                                                       | Data Type and Value                                                                                                                                                     | Justification                                             | Field Level Help                                                                                                                                                                                                                                      |
|-----------------------------------------|--------------------------------------------------------------------------------------------------------------------------------------------------|-------------------------------------------------------------------------------------------------------------------------------------------------------------------------|-----------------------------------------------------------|-------------------------------------------------------------------------------------------------------------------------------------------------------------------------------------------------------------------------------------------------------|
| <b>Oocyte donor/provider source</b>     | Unique name of commercial oocyte bank for oocytes sourced from commercial egg bank or chart number of donor patient (if donated at same clinic). | Alpha-Numeric                                                                                                                                                           | Link outcomes to origin of oocytes used to create embryos | Unique name of commercial oocyte bank for oocytes sourced from commercial egg bank or chart number of donor patient (if donated at same clinic).                                                                                                      |
| <b>Oocyte donor/provider status</b>     | Type of donation when not 'own' oocytes                                                                                                          | Select all applicable<br>1. Anonymous<br>2. Non-anonymous<br>3. Anonymous oocyte sharing<br>4. Non-anonymous oocyte sharing<br>5. Anonymous from commercial oocyte bank | For traceability purposes                                 | Type of donation<br>For same-sex female partner oocyte provider, choose non-anonymous. If oocyte provider intends to keep some oocytes for own use, choose non-anonymous or anonymous oocyte sharing, whichever applies.<br><br>Select all applicable |
| <b># of oocytes retrieved or thawed</b> | Number of cumulus-oocyte complexes (COCs) collected and/or number of oocytes thawed                                                              | Numeric                                                                                                                                                                 | Marker of ovarian response in fresh cycle                 | Number of cumulus-oocyte complexes (COCs) collected and/or number of oocytes thawed                                                                                                                                                                   |
| <b># of oocytes cryopreserved</b>       | Number of oocytes frozen or vitrified in an oocyte banking cycle or an IVF cycle e.g. no sperm were available                                    | Numeric                                                                                                                                                                 | For traceability purposes                                 | Number of oocytes frozen or vitrified in an oocyte banking cycle or an IVF cycle e.g. no sperm were available                                                                                                                                         |
| <b>Oocyte freeze ID</b>                 | Unique code to identify that cohort of frozen oocytes                                                                                            | Alpha-Numeric                                                                                                                                                           | For traceability purposes                                 | Unique code to identify that cohort of frozen oocytes                                                                                                                                                                                                 |
| <b>Oocyte freeze date</b>               | Date of oocyte cryopreservation                                                                                                                  | Date                                                                                                                                                                    | For traceability purposes                                 | Date of oocyte cryopreservation                                                                                                                                                                                                                       |
| <b>Oocyte cryo method</b>               | Type of method used to cryopreserve the oocytes                                                                                                  | Select one only<br>1. Slow freezing<br>2. Vitrification                                                                                                                 | Link outcomes post thaw/warm to methodology used          | Type of method used to cryopreserve the oocytes                                                                                                                                                                                                       |



| Data Element                 | Definition                                                                   | Data Type and Value                                                                                                                                                                       | Justification                                                 | Field Level Help                                                                                                                                                                                                                    |
|------------------------------|------------------------------------------------------------------------------|-------------------------------------------------------------------------------------------------------------------------------------------------------------------------------------------|---------------------------------------------------------------|-------------------------------------------------------------------------------------------------------------------------------------------------------------------------------------------------------------------------------------|
|                              |                                                                              | 3. Mixed                                                                                                                                                                                  |                                                               |                                                                                                                                                                                                                                     |
| <b>Sperm origin</b>          | Origin of male gametes used to create embryos                                | Select all applicable<br>1. Fresh own/ sperm<br>2. Fresh partner sperm<br>3. Frozen own sperm<br>4. Frozen partner sperm<br>5. Frozen donor sperm                                         | Link outcomes to origin of spermatozoa used to create embryos | Origin of male gametes used to create embryos<br><br>Select all applicable                                                                                                                                                          |
| <b>Age of sperm provider</b> | Age of sperm provider at date of sperm collection                            | Numeric<br><br>Do not enter if more than one sperm provider is used in this cycle or if sperm from more than one collection date is used in this cycle (e.g. fresh and frozen sperm used) | Link outcomes to sperm quality                                | Age of sperm provider at date of sperm collection<br><br>Do not enter if more than one sperm provider is used in this cycle or if sperm from more than one collection date is used in this cycle (e.g. fresh and frozen sperm used) |
| <b>Sperm donor ID</b>        | Unique code to identify the sperm donor                                      | Alpha-Numeric                                                                                                                                                                             | For traceability purposes                                     | Unique code to identify the sperm donor                                                                                                                                                                                             |
| <b>Sperm donor bank</b>      | Unique code/name of sperm bank used to obtain donor sperm                    | Alpha-Numeric                                                                                                                                                                             | For traceability purposes                                     | Unique code/name of sperm bank used to obtain donor sperm                                                                                                                                                                           |
| <b>Sperm donor status</b>    | Type of donation                                                             | 1. Anonymous<br>2. Non-anonymous                                                                                                                                                          | For traceability purposes                                     | Type of donation                                                                                                                                                                                                                    |
| <b>Sperm source</b>          | Source of collected sperm (for partner if both partner and donor sperm used) | Select one only<br>1. Semen<br>2. Epididymal<br>3. Urine (retrograde)<br>4. Testicular- NOA<br>5. Testicular- OA                                                                          | Link outcomes to sperm maturity                               | Source of collected sperm (for partner if both partner and donor sperm used)<br><br>Select one only                                                                                                                                 |
| <b>Semen volume</b>          | Volume of fresh (neat, pre-wash) semen sample - only                         | Numeric with decimal (mL)                                                                                                                                                                 | Allow to calculate total motile count                         | Volume of fresh (neat, pre-wash) semen sample - only                                                                                                                                                                                |

| Data Element                               | Definition                                                                                                  | Data Type and Value                                                                                                                           | Justification                                                                    | Field Level Help                                                                                                                                                              |
|--------------------------------------------|-------------------------------------------------------------------------------------------------------------|-----------------------------------------------------------------------------------------------------------------------------------------------|----------------------------------------------------------------------------------|-------------------------------------------------------------------------------------------------------------------------------------------------------------------------------|
|                                            | applicable for fresh partner semen                                                                          |                                                                                                                                               |                                                                                  | applicable for fresh partner semen                                                                                                                                            |
| <b>Sperm too low to count</b>              | Too few sperm to make an accurate count                                                                     | Yes or no                                                                                                                                     | Explain reason for no sperm count entered                                        | Too few sperm to make an accurate count                                                                                                                                       |
| <b>Sperm count</b>                         | Sperm concentration in fresh (neat, pre-wash) semen sample – only applicable for fresh partner semen        | Numeric with decimal (million/mL)<br><br>Not relevant for other sources of sperm – i.e. counts for epididymal/testicular sperm are inaccurate | Link outcomes to semen quality                                                   | Sperm concentration in fresh (neat, pre-wash) semen sample – only applicable for fresh partner semen                                                                          |
| <b>Sperm motility</b>                      | Percentage of motile sperm in fresh (neat, pre-wash) semen sample – only applicable for fresh partner semen | Numeric (%)<br><br>Not relevant for other sources of sperm – i.e. motility is expected to be very low for all epididymal/testicular samples   | Link outcomes to semen quality                                                   | Percentage of motile sperm in fresh (neat, pre-wash) semen sample – only applicable for fresh partner semen                                                                   |
| <b>Oocyte &amp; sperm collection notes</b> | Generic text field to document notes related to oocyte and sperm collection                                 | Text<br><br>For Non-Ontario clinics, no patient identifying information, or parts thereof, can be used                                        | The intent is to use this field for notes related to oocyte and sperm collection | Generic text field to document notes related to oocyte and sperm collection<br><br>For Non-Ontario clinics, no patient identifying information, or parts thereof, can be used |
| <b>Embryology Tab</b>                      |                                                                                                             |                                                                                                                                               |                                                                                  |                                                                                                                                                                               |
| <b>Insemination method</b>                 | Method(s) used to inseminate the oocytes and on which day(s) post oocyte collection                         | Select all applicable<br>1. Conventional IVF on day 0<br>2. IVF on day 0 with rescue ICSI<br>3. ICSI on day 0                                 | Link outcomes to insemination method and time post oocyte collection             | Method(s) used to inseminate the oocytes<br><br>Select all applicable                                                                                                         |

| Data Element                          | Definition                                                                                                                                                        | Data Type and Value                                                                                                                                                                                                                        | Justification                                                     | Field Level Help                                                                                                                                                  |
|---------------------------------------|-------------------------------------------------------------------------------------------------------------------------------------------------------------------|--------------------------------------------------------------------------------------------------------------------------------------------------------------------------------------------------------------------------------------------|-------------------------------------------------------------------|-------------------------------------------------------------------------------------------------------------------------------------------------------------------|
|                                       |                                                                                                                                                                   | 4. ICSI on day 1<br>5. ICSI on day 2<br>6. ICSI on day 3<br>7. Not done<br>8. IVF using vaginal incubator device                                                                                                                           |                                                                   |                                                                                                                                                                   |
| <b># oocytes inseminated/injected</b> | Number of COCs inseminated by conventional IVF and/or number of oocytes injected by ICSI                                                                          | Numeric                                                                                                                                                                                                                                    | Link outcomes to total number of “used” oocytes                   | Number of COCs inseminated by conventional IVF and/or number of oocytes injected by ICSI                                                                          |
| <b># oocytes not used</b>             | Number of COCs collected in a fresh cycle or number of thawed/warmed oocytes that were not used in this cycle                                                     | Numeric                                                                                                                                                                                                                                    | For traceability purposes                                         | Number of COCs collected in a fresh cycle or number of thawed/warmed oocytes that were not used in this cycle                                                     |
| <b>Reasons for no use</b>             | Reasons for not using some of the COCs or thawed/warmed oocytes                                                                                                   | Select all applicable<br>1. Immaturity<br>2. Degeneration<br>3. Abnormal<br>4. Religious belief<br>5. No sperm<br>6. Inadequate number of sperm<br>7. Donated to another patient<br>8. Donated to research<br>9. Information not available | For traceability purposes                                         | Reasons for not using some of the COCs or thawed/warmed oocytes<br><br>Select all applicable                                                                      |
| <b># of MII oocytes</b>               | Number of MII oocytes injected and/or number of MII oocytes on day 1 after conventional IVF (not possible to have an accurate value on day 0 in conventional IVF) | Numeric                                                                                                                                                                                                                                    | Clarify number of mature oocytes collected and used in this cycle | Number of MII oocytes injected and/or number of MII oocytes on day 1 after conventional IVF (not possible to have an accurate value on day 0 in conventional IVF) |

| Data Element                              | Definition                                                                                                     | Data Type and Value                                                                                                                   | Justification                                                                            | Field Level Help                                                                                               |
|-------------------------------------------|----------------------------------------------------------------------------------------------------------------|---------------------------------------------------------------------------------------------------------------------------------------|------------------------------------------------------------------------------------------|----------------------------------------------------------------------------------------------------------------|
| <b># with normal fertilization (2PN)</b>  | Number of zygotes with normal fertilization, i.e. 2PN                                                          | Numeric                                                                                                                               | Marker of oocyte and sperm quality                                                       | Number of zygotes with normal fertilization, i.e. 2PN                                                          |
| <b># utilizable embryos</b>               | Number of embryos utilizable by the end of the culture period regardless if surplus embryos were frozen or not | Numeric                                                                                                                               | Clarify number of embryos created and number utilizable by the end of the culture period | Number of embryos utilizable by the end of the culture period regardless if surplus embryos were frozen or not |
| <b># embryos cryopreserved</b>            | Number of embryos frozen or vitrified in this cycle                                                            | Numeric                                                                                                                               | For traceability purpose                                                                 | Number of embryos frozen or vitrified in this cycle                                                            |
| <b>Reason for embryo cryopreservation</b> | Reason for embryo preservation                                                                                 | Select one:<br>1. Later own use<br>2. Later donation<br>3. PGT-A testing (batching)<br>4. PGT-M/PGT-SR testing (batching)<br>5. Other | Provides information on reasons for embryo freezing in addition to later use by patient  |                                                                                                                |
| <b>Embryo stage at freezing</b>           | Embryo stage at time of cryopreservation                                                                       | Select all applicable<br>1. 2PN<br>2. Cleavage stage<br>3. Morula<br>4. Blastocyst<br>5. Unknown                                      | Link outcome post thaw/warm to embryo stage at time of cryopreservation                  | Embryo stage at time of cryopreservation<br><br>Select all applicable                                          |
| <b>Embryo cryo method</b>                 | Method used to cryopreserve the embryos                                                                        | Select one only<br>1. Slow freezing<br>2. Vitrification<br>3. Mixed                                                                   | Link outcomes post thaw/warm to methodology used                                         | Method used to cryopreserve the embryos                                                                        |
| <b>Embryo freeze ID #1</b>                | Unique code to identify freeze of first batch of embryos from this cycle                                       | Alpha-Numeric                                                                                                                         | For traceability purposes                                                                | Unique code to identify freeze of first batch of embryos from this cycle                                       |
| <b>Embryo freeze date #1</b>              | Date associated with freeze of first batch of embryos from this cycle                                          | Date                                                                                                                                  | For traceability purposes                                                                | Date associated with freeze of first batch of embryos from this cycle                                          |

| Data Element                          | Definition                                                                                                                                                                            | Data Type and Value | Justification             | Field Level Help                                                                                                                                                                      |
|---------------------------------------|---------------------------------------------------------------------------------------------------------------------------------------------------------------------------------------|---------------------|---------------------------|---------------------------------------------------------------------------------------------------------------------------------------------------------------------------------------|
| <b>Embryo freeze ID #2</b>            | Unique code to identify freeze of second batch of embryos from this cycle                                                                                                             | Al pha-Numeric      | For traceability purposes | Uni que code to identify freeze of second batch of embryos from this cycle                                                                                                            |
| <b>Embryo freeze date #2</b>          | Date associated with freeze of second batch of embryos from this cycle                                                                                                                | Date                | For traceability purposes | Date associated with freeze of second batch of embryos from this cycle                                                                                                                |
| <b>Embryo freeze ID #3</b>            | Uni que code to identify freeze of thi rd batch of embryos from this cycle                                                                                                            | Al pha-Numeric      | For traceability purposes | Uni que code to identify freeze of thi rd batch of embryos from this cycle                                                                                                            |
| <b>Embryo freeze date #3</b>          | Date associated with freeze of thi rd batch of embryos from this cycle                                                                                                                | Date                | For traceability purposes | Date associated with freeze of thi rd batch of embryos from this cycle                                                                                                                |
| <b>Embryo freeze ID #4</b>            | Uni que code to identify freeze of fourth batch of embryos from this cycle                                                                                                            | Al pha-Numeric      | For traceability purposes | Uni que code to identify freeze of fourth batch of embryos from this cycle                                                                                                            |
| <b>Embryo freeze date #4</b>          | Date associated with freeze of fourth batch of embryos from this cycle                                                                                                                | Date                | For traceability purposes | Date associated with freeze of fourth batch of embryos from this cycle                                                                                                                |
| <b>Embryo thaw date</b>               | Date of embryo thawing/warming with the intent of transferring them in an FET cycle                                                                                                   | Date                | For traceability purposes | Date of embryo thawing/warming with the intent of transferring them in an FET cycle                                                                                                   |
| <b>Freeze ID #1 of thawed embryos</b> | Uni que code originally assigned to the embryo cohort at freezi ng<br><br>For frozen embryos received from another clinic, code given by recei ving clinic for that cohort of embryos | Al pha-Numeric      | For traceability purposes | Uni que code originally assigned to the embryo cohort at freezi ng<br><br>For frozen embryos received from another clinic, code given by recei ving clinic for that cohort of embryos |
| <b>Freeze ID #2 of thawed embryos</b> | Uni que code originally assigned to the second                                                                                                                                        | Al pha-Numeric      | For traceability purposes | Uni que code originally assigned to the second                                                                                                                                        |

| Data Element                          | Definition                                                                                                                                                                                                                       | Data Type and Value | Justification             | Field Level Help                                                                                                                                                                                                                                                                                     |
|---------------------------------------|----------------------------------------------------------------------------------------------------------------------------------------------------------------------------------------------------------------------------------|---------------------|---------------------------|------------------------------------------------------------------------------------------------------------------------------------------------------------------------------------------------------------------------------------------------------------------------------------------------------|
|                                       | <p>embryo cohort at freezing if more than one cohort used</p> <p>For frozen embryos received from another clinic, code given by receiving clinic for that cohort of embryos</p>                                                  |                     |                           | <p>embryo cohort at freezing if more than one cohort used</p> <p>For frozen embryos received from another clinic, code given by receiving clinic for that cohort of embryos</p>                                                                                                                      |
| <b>Freeze ID #3 of thawed embryos</b> | <p>Unique code originally assigned to the third embryo cohort at freezing if more than two cohorts used</p> <p>For frozen embryos received from another clinic, code given by receiving clinic for that cohort of embryos</p>    | Alpha-Numeric       | For traceability purposes | <p>Unique code originally assigned to the third embryo cohort at freezing if more than two cohorts used</p> <p>For frozen embryos received from another clinic, code given by receiving clinic for that cohort of embryos</p>                                                                        |
| <b>Freeze ID #4 of thawed embryos</b> | <p>Unique code originally assigned to the fourth embryo cohort at freezing if more than three cohorts used</p> <p>For frozen embryos received from another clinic, code given by receiving clinic for that cohort of embryos</p> | Alpha-Numeric       | For traceability purposes | <p>Unique code originally assigned to the fourth embryo cohort at freezing if more than three cohorts used.</p> <p>Unique code originally assigned to the embryo cohort at freezing. For frozen embryos received from another clinic, code given by receiving clinic for that cohort of embryos.</p> |
| <b>Donated embryo</b>                 | Indicate whether or not embryos are donated                                                                                                                                                                                      | Yes or no           | For traceability purposes | Indicate whether or not embryos are donated                                                                                                                                                                                                                                                          |

| Data Element                           | Definition                                                                                             | Data Type and Value                                                                                    | Justification                                                        | Field Level Help                                                                                                                                             |
|----------------------------------------|--------------------------------------------------------------------------------------------------------|--------------------------------------------------------------------------------------------------------|----------------------------------------------------------------------|--------------------------------------------------------------------------------------------------------------------------------------------------------------|
| <b># embryos thawed</b>                | Number of embryos thawed/warmed in this FET cycle                                                      | Numeric                                                                                                | For traceability purposes                                            | Number of embryos thawed/warmed in this FET cycle                                                                                                            |
| <b>Embryo stage at thawing</b>         | Type of embryos thawed/warmed in this FET cycle                                                        | Select all applicable<br>1. 2PN<br>2. Cleavage stage<br>3. Morula<br>4. Blastocyst<br>5. Unknown       | Link outcomes post thaw/warm to stage at freezing                    | Type of embryos thawed/warmed in this FET cycle<br><br>Select all applicable                                                                                 |
| <b>Embryo cryo method</b>              | Method used to cryopreserve the thawed/warmed embryos                                                  | Select one only<br>1. Slow freezing<br>2. Vitrification<br>3. Mixed                                    | Link outcomes post thaw/warm to cryo methodology                     | Method used to cryopreserve the thawed/warmed embryos                                                                                                        |
| <b># utilizable embryos after thaw</b> | Number of thawed/warmed embryos utilizable for transfer or refreezing by end of culture post thaw/warm | Numeric                                                                                                | Marker of embryo quality pre-freeze and cryopreservation methodology | Number of thawed/warmed embryos utilizable for transfer or refreezing by end of culture post thaw/warm                                                       |
| <b>Embryology notes</b>                | Generic text field to document notes related to embryology                                             | Text<br><br>For Non-Ontario clinics, no patient identifying information, or parts thereof, can be used | The intent is to use this field for notes related to embryology      | Generic text field to document notes related to embryology<br><br>For Non-Ontario clinics, no patient identifying information, or parts thereof, can be used |
| <b>Transfer Tab</b>                    |                                                                                                        |                                                                                                        |                                                                      |                                                                                                                                                              |
| <b>Embryo transfer</b>                 | Transfer of embryos into uterine cavity of patient or surrogate in a fresh or frozen cycle             | Yes or no<br><br>Select NO if transfer was attempted but was not successful                            | For traceability purposes                                            | Transfer of embryos into uterine cavity of patient or surrogate in a fresh or frozen cycle<br><br>Select NO if transfer was                                  |

| Data Element                         | Definition                                                  | Data Type and Value                                                                                                                                                                                                                                                                                                                                                                                                                                                                                                            | Justification                                                                    | Field Level Help                                                                      |
|--------------------------------------|-------------------------------------------------------------|--------------------------------------------------------------------------------------------------------------------------------------------------------------------------------------------------------------------------------------------------------------------------------------------------------------------------------------------------------------------------------------------------------------------------------------------------------------------------------------------------------------------------------|----------------------------------------------------------------------------------|---------------------------------------------------------------------------------------|
|                                      |                                                             |                                                                                                                                                                                                                                                                                                                                                                                                                                                                                                                                |                                                                                  | attempted but was not successful                                                      |
| <b>Reason for no ET</b>              | Reason for no embryo transfer                               | Select one only<br>1. No oocytes<br>2. No utilizable oocytes<br>3. No normal fertilization<br>4. No utilizable embryos<br>5. No sperm<br>6. Freeze all, OHSS risk<br>7. Freeze all, PGT-A<br>8. Freeze all, PGT-M/PGT-SR<br>9. Freeze all, other reason than OHSS risk or PGT<br>10. Freeze all, other reason than OHSS risk (unknown if PGT)<br>11. Inadequate uterine lining<br>12. Patient choice<br><br>*: Value used for historical data as well as to temporarily support upload sites during EMR updates of new changes | Clarify reason for no ET                                                         | If embryo transfer is not done, indicate the reason<br><br>Select one only            |
| <b>Preparation of uterine lining</b> | Protocol used to prepare the uterine lining before transfer | 1. Hormone replacement cycle<br>2. Natural cycle<br>3. COS                                                                                                                                                                                                                                                                                                                                                                                                                                                                     | Link outcomes to uterine lining preparation                                      | Protocol used to prepare the uterine lining before transfer                           |
| <b>Endometrial thickness</b>         | Thickness of endometrium within a few days of transfer      | Numeric with decimal (mm)                                                                                                                                                                                                                                                                                                                                                                                                                                                                                                      | Marker of uterine receptivity                                                    | Thickness of endometrium within a few days                                            |
| <b>Transfer date</b>                 | Date of embryo transfer                                     | Date<br>If embryos are transferred on more than one day, enter the                                                                                                                                                                                                                                                                                                                                                                                                                                                             | Used to calculate length of time embryos have been cultured on the transfer day, | Date of embryo transfer<br>If embryos are transferred on more than one day, enter the |



| Data Element                                                              | Definition                                                                                                   | Data Type and Value                                                                                                                                                                        | Justification                                                              | Field Level Help                                                                                                                                                                     |
|---------------------------------------------------------------------------|--------------------------------------------------------------------------------------------------------------|--------------------------------------------------------------------------------------------------------------------------------------------------------------------------------------------|----------------------------------------------------------------------------|--------------------------------------------------------------------------------------------------------------------------------------------------------------------------------------|
|                                                                           |                                                                                                              | first transfer date                                                                                                                                                                        | i.e. day 2, 3, 4, 5, 6                                                     | first transfer date                                                                                                                                                                  |
| <b>ET date adjusted due to endometrial receptivity test biopsy result</b> | Indicates whether transfer date has been adjusted due to ERA biopsy                                          | Yes or no                                                                                                                                                                                  | Helps to explain why transfer date might be earlier or later than expected | Indicates whether transfer date has been adjusted due to endometrial receptivity testing e.g., ERA biopsy                                                                            |
| <b>ET ultrasound-guided</b>                                               | Placement of the embryos in the uterine cavity done with ultrasound guidance                                 | Yes or no                                                                                                                                                                                  | Clarify approach used for embryo transfer                                  | Placement of the embryos in the uterine cavity done with ultrasound guidance                                                                                                         |
| <b>Assisted zona hatching</b>                                             | Method used to thin or perforate the zona before transfer, for all or some embryos                           | <ol style="list-style-type: none"> <li>1. None</li> <li>2. Mechanical</li> <li>3. Laser</li> <li>4. Acid</li> <li>5. Enzyme</li> </ol> <p>Zona manipulation for PGS or PGD is excluded</p> | Link outcomes to the manipulation of the zona pellucida pre transfer       | <p>Method used to thin or perforate the zona before transfer, for all or some embryos</p> <p>Zona manipulation for PGS/PGD is excluded</p>                                           |
| <b># embryos transferred</b>                                              | Number of embryos transferred fresh and/or thawed/warmed, including thawed embryos added to a fresh transfer | <p>Numeric</p> <p>Include all embryos transferred even if on different days</p>                                                                                                            | Link outcomes to number of embryos transferred                             | <p>Number of embryos transferred fresh and/or thawed/warmed, including thawed embryos added to a fresh transfer</p> <p>Include all embryos transferred even if on different days</p> |

| Data Element                                  | Definition                                                                        | Data Type and Value                                                                                                                                                                                                                                                                                                                                                                                                                                                                                                            | Justification                                                                                                                                                                                                   | Field Level Help                                                                                                                                                                                                                      |
|-----------------------------------------------|-----------------------------------------------------------------------------------|--------------------------------------------------------------------------------------------------------------------------------------------------------------------------------------------------------------------------------------------------------------------------------------------------------------------------------------------------------------------------------------------------------------------------------------------------------------------------------------------------------------------------------|-----------------------------------------------------------------------------------------------------------------------------------------------------------------------------------------------------------------|---------------------------------------------------------------------------------------------------------------------------------------------------------------------------------------------------------------------------------------|
| <b>Elective Single Embryo Transfer (eSET)</b> | Transfer of one (eSET) embryo selected from a larger cohort of utilizable embryos | Yes or no                                                                                                                                                                                                                                                                                                                                                                                                                                                                                                                      | Link outcomes to number of embryos transferred electively vs. non-electively due to poor embryo cohort                                                                                                          | Transfer of one (eSET) embryo selected from a larger cohort of utilizable embryos<br><br>If the clinic only thaws one embryo with the intention of an eSET, it can still be called an eSET if there are more embryos left in freezer. |
| <b>Source of transferred embryos</b>          | Origin of embryos for this transfer                                               | Select all applicable<br>1. Fresh embryos from own oocytes-partner sperm<br>2. Fresh embryos from own oocytes-donor sperm<br>3. Fresh embryos from donor oocytes-partner sperm<br>4. Fresh embryos from partner oocytes-donor sperm<br>5. Fresh embryos from donor oocytes-own sperm<br>6. Fresh embryos from donor oocytes-donor sperm<br>7. Frozen embryos from own oocytes-partner sperm<br>8. Frozen embryos from own oocytes-donor sperm<br>9. Frozen embryos from partner oocytes-donor sperm<br>10. Frozen embryos from | Link outcomes to origin of embryos<br><br>This becomes important for linkage with congenital anomalies in offspring as cycles are becoming more complex with the use of own and donor gametes in a single cycle | Origin of embryos for this transfer<br><br>Select all applicable                                                                                                                                                                      |

| Data Element                                  | Definition                                                                                     | Data Type and Value                                                                                                                                                                                                                                                   | Justification                                                           | Field Level Help                                                                                           |
|-----------------------------------------------|------------------------------------------------------------------------------------------------|-----------------------------------------------------------------------------------------------------------------------------------------------------------------------------------------------------------------------------------------------------------------------|-------------------------------------------------------------------------|------------------------------------------------------------------------------------------------------------|
|                                               |                                                                                                | donor oocytes-own sperm<br>11. Frozen embryos from donor oocytes-partner sperm<br>12. Frozen embryos from donor oocytes-donor sperm<br>13. Frozen embryo was previously thawed and refrozen<br>14. Unable to provide                                                  |                                                                         |                                                                                                            |
| <b>Insemination method</b>                    | Insemination of this transferred embryo(s)                                                     | 1. Conventional IVF<br>2. ICSI<br>3. Mixed<br>4. Unknown                                                                                                                                                                                                              | Allows better tracking of offspring created by each insemination method | Indicates whether this embryo has been created by which insemination method                                |
| <b>Pre-Implantation Genetic Testing done</b>  | Indicates whether the embryos being transferred have has pre-implantation genetic testing done | 5. Yes or no                                                                                                                                                                                                                                                          |                                                                         | Indicates whether the transferred embryo(s) has had pre-implantation genetic testing of any kind performed |
| <b>Characteristics of transferred embryos</b> | Provides information of embryo testing if done)                                                | Choose one:<br>1. Utilizable (untested)<br>2. Euploid after PGT-A testing<br>3. Aneuploid after PGT-A testing<br>4. Mosaic after PGT-A testing<br>5. Free of genetic disease after PGT-M/PGT-SR testing<br>6. Unknown result after any PGT testing<br>7. Embryo after |                                                                         |                                                                                                            |

| Data Element                                                     | Definition                                                                                                                                                                                       | Data Type and Value                                                                                                                                              | Justification                                                                                                                                                                                                     | Field Level Help                                                                                                                                                                                 |
|------------------------------------------------------------------|--------------------------------------------------------------------------------------------------------------------------------------------------------------------------------------------------|------------------------------------------------------------------------------------------------------------------------------------------------------------------|-------------------------------------------------------------------------------------------------------------------------------------------------------------------------------------------------------------------|--------------------------------------------------------------------------------------------------------------------------------------------------------------------------------------------------|
|                                                                  |                                                                                                                                                                                                  | mitochondrial manipulation (e.g., Augment)                                                                                                                       |                                                                                                                                                                                                                   |                                                                                                                                                                                                  |
| <b>Number of thaws for the transferred embryo(s) this embryo</b> | Number of times transferred embryo has been thawed and refrozen                                                                                                                                  | <ol style="list-style-type: none"> <li>1. One</li> <li>2. Two</li> <li>3. Three</li> <li>4. More than three</li> <li>1. Unknown</li> </ol>                       | To identify embryos that have been frozen and thawed more than once prior to transfer. If more than one embryo is transferred, indicate the embryo that has been thawed and refrozen the highest number of times. | Number of times transferred embryo has been thawed and refrozen. If more than one embryo is transferred, indicate the embryo that has been thawed and refrozen the highest number of times.      |
| <b>Site of PGT testing of embryo</b>                             | Indicates the site where cells were removed during PGT testing                                                                                                                                   | <ol style="list-style-type: none"> <li>2. Blastomere</li> <li>3. Polar body</li> <li>4. Trophectoderm</li> <li>5. Inner cell mass</li> <li>6. Unknown</li> </ol> | To track whether there is any impact on the embryo/fetus depending of the testing site                                                                                                                            | Indicates origin of cell removal for testing.                                                                                                                                                    |
| <b>Gestational Carrier (surrogate)</b>                           | A woman who carries a pregnancy with an agreement that she will give the offspring to the intended parent(s)<br>Gametes can originate from the intended parent(s) and/or a third party (parties) | Yes or no                                                                                                                                                        | Clarify link between outcomes and gamete providers only if gestational carrier ID is traceable to original treatment cycle                                                                                        | A woman who carries a pregnancy with an agreement that she will give the offspring to the intended parent(s)<br>Gametes can originate from the intended parent(s) and/or a third party (parties) |
| <b>Gestational carrier (surrogate) chart #</b>                   | Gestational Carrier unique identifier at the clinic level                                                                                                                                        | Alpha-Numeric<br><br>For non-Ontario clinics, no patient identifying information, or parts thereof, can be used (i.e., no patient name, initials, or complete    | For traceability purposes<br><br>Note that the same woman might have a different chart # in another clinic                                                                                                        | Gestational Carrier unique identifier at the clinic level                                                                                                                                        |

| Data Element                      | Definition                                                                          | Data Type and Value                                                                                                                                                                                             | Justification                            | Field Level Help                                                                                                                                                                                                                                                         |
|-----------------------------------|-------------------------------------------------------------------------------------|-----------------------------------------------------------------------------------------------------------------------------------------------------------------------------------------------------------------|------------------------------------------|--------------------------------------------------------------------------------------------------------------------------------------------------------------------------------------------------------------------------------------------------------------------------|
|                                   |                                                                                     | health card number)                                                                                                                                                                                             |                                          |                                                                                                                                                                                                                                                                          |
| <b>Height of embryo recipient</b> | Height of female patient at ET or FET, or height of surrogate receiving the embryos | Numeric (cm)<br><br>This field is automatically filled in with the height of the oocyte provider<br><br>If donor oocytes or a gestational carrier is used, this field should be filled in manually              |                                          | Height of female patient at ET or FET, or height of surrogate receiving the embryo<br><br>This field is automatically filled in with the height of the oocyte provider<br><br>If donor oocytes or a gestational carrier is used, this field should be filled in manually |
| <b>Weight of embryo recipient</b> | Weight of female patient at ET or FET, or weight of surrogate receiving the embryos | Numeric with decimal (kg)<br><br>This field is automatically filled in with the weight of the oocyte provider<br><br>If donor oocytes or a gestational carrier is used, this field should be filled in manually |                                          | Weight of female patient at ET or FET, or weight of surrogate receiving the embryo<br><br>This field is automatically filled in with the weight of the oocyte provider<br><br>If donor oocytes or a gestational carrier is used, this field should be filled in manually |
| <b>BMI of embryo recipient</b>    | BMI of female patient at ET or FET, or BMI of surrogate receiving the embryos       | Numeric with decimal (kg/m <sup>2</sup> )                                                                                                                                                                       | Link outcomes to BMI of embryo recipient | Body Mass Index (in kg/m <sup>2</sup> ) of female patient at ET or FET, or BMI of surrogate receiving the embryo<br><br>If height and weight are entered, BMI will be calculated                                                                                         |

| Data Element                                 | Definition                                                          | Data Type and Value                                                                                                                                                                                                                                                                                                                                                                                      | Justification                                                        | Field Level Help                                                                                                                                                  |
|----------------------------------------------|---------------------------------------------------------------------|----------------------------------------------------------------------------------------------------------------------------------------------------------------------------------------------------------------------------------------------------------------------------------------------------------------------------------------------------------------------------------------------------------|----------------------------------------------------------------------|-------------------------------------------------------------------------------------------------------------------------------------------------------------------|
|                                              |                                                                     |                                                                                                                                                                                                                                                                                                                                                                                                          |                                                                      | automatically when the SAVE or PROCEED button is clicked<br><br>BMI can be entered directly                                                                       |
| <b>Transfer notes</b>                        | Generic text field to document notes related to embryo transfer     | Text<br><br>For Non-Ontario clinics, no patient identifying information, or parts thereof, can be used                                                                                                                                                                                                                                                                                                   | The intent is to use this field for notes related to embryo transfer | Generic text field to document notes related to embryo transfer<br><br>For Non-Ontario clinics, no patient identifying information, or parts thereof, can be used |
| <b>Treatment &amp; Pregnancy Outcome Tab</b> |                                                                     |                                                                                                                                                                                                                                                                                                                                                                                                          |                                                                      |                                                                                                                                                                   |
| <b>Complications</b>                         | Complications experienced by patient/oocyte donor during this cycle | Select all applicable<br>1. None<br>2. IVF medication side effect requiring change in intended treatment<br>3. Adverse reaction to anaesthetic<br>4. Moderate/Severe OHSS requiring paracentesis<br>5. Moderate/Severe OHSS requiring culdocentesis<br>6. Moderate/Severe OHSS requiring pleural drainage or thoracentesis<br>7. OHSS requiring IV hydration<br>8. Infection<br>9. Haemorrhage requiring | ART safety monitoring element                                        | Complications experienced by patient/ oocyte donor during this cycle<br><br>Select all applicable<br><br>Enter “none” for complications not on this list          |

| Data Element             | Definition                                                | Data Type and Value                                                                                                                                                                                                                                  | Justification                 | Field Level Help                                                                                                                                                                                                                                                                                                                                     |
|--------------------------|-----------------------------------------------------------|------------------------------------------------------------------------------------------------------------------------------------------------------------------------------------------------------------------------------------------------------|-------------------------------|------------------------------------------------------------------------------------------------------------------------------------------------------------------------------------------------------------------------------------------------------------------------------------------------------------------------------------------------------|
|                          |                                                           | blood transfusion<br>10. Thromboembolism<br>11. Ovarian torsion<br>12. Bladder/Bowel injury<br>13. Patient death<br>14. Electrolyte disturbance<br>15. Kidney problems<br>16. Ovarian rupture<br><br>Enter "none" for complications not on this list |                               |                                                                                                                                                                                                                                                                                                                                                      |
| <b>Hospitalization</b>   | The patient was hospitalized as a result of complications | Yes or no                                                                                                                                                                                                                                            | ART safety monitoring element | The patient was hospitalized as a result of complications                                                                                                                                                                                                                                                                                            |
| <b>Treatment outcome</b> | Outcome of treatment cycle                                | Select one only<br>1. Cycle not completed to transfer<br>2. Negative $\beta$ -hCG<br>3. Positive $\beta$ -hCG<br>4. Unknown<br>5. Cycle cancelled<br><br>Patient lost in follow-up is included as unknown                                            | Effectiveness of treatment    | Outcome of treatment cycle<br><br>To be completed for ALL treatment cycles (except Oocyte Banking and Simulated Primary Cycles), including cycles that were cancelled after start of stimulation and prior to egg collection, had no insemination, no fertilization, or no embryo transfer<br><br>Patients lost in follow-up are included as unknown |

| Data Element             | Definition                                                                                                                                                                                                          | Data Type and Value                                                                                                                                  | Justification                                                                                                                                                                                                         | Field Level Help                                                                                                                                                                                                   |
|--------------------------|---------------------------------------------------------------------------------------------------------------------------------------------------------------------------------------------------------------------|------------------------------------------------------------------------------------------------------------------------------------------------------|-----------------------------------------------------------------------------------------------------------------------------------------------------------------------------------------------------------------------|--------------------------------------------------------------------------------------------------------------------------------------------------------------------------------------------------------------------|
| <b>Type of pregnancy</b> | Type of pregnancy achieved                                                                                                                                                                                          | Select one only<br>1. Not pregnant<br>2. Biochemical<br>3. Ectopic<br>4. Clinical Intrauterine<br>5. Heterotopic<br>6. Unknown<br>7. Molar Pregnancy | Effectiveness of treatment                                                                                                                                                                                            | Type of pregnancy achieved<br><br>Select one only                                                                                                                                                                  |
| <b># US fetal sacs</b>   | Number of gestational sacs (includes ectopic and heterotopic) by ultrasonographic visualization at ≈6-8 weeks                                                                                                       | Numeric                                                                                                                                              | Marker of implantation when divided by the number of embryos transferred                                                                                                                                              | Number of gestational sacs (includes ectopic and heterotopic) by ultrasonographic visualization at ≈6-8 weeks                                                                                                      |
| <b># US fetal hearts</b> | Number of fetal hearts (includes ectopic or heterotopic) by ultrasonographic visualization at ≈6-8 weeks                                                                                                            | Numeric<br><br>If a later ultrasound showed more fetal hearts, enter the later results                                                               | Marker of pregnancy viability and used to calculate multiple pregnancy rate by dividing number of treatment cycles where more than 1 FH was observed by number of treatment cycles where one or more FH were observed | Number of fetal hearts (includes ectopic or heterotopic) by ultrasonographic visualization at ≈6-8 weeks<br><br>If a later ultrasound showed more fetal hearts, enter the later results                            |
| <b>Chorionicity</b>      | The nature of the chorions from which individuals are derived e.g., within the same chorion (monochorionic or 1), dichorionic twins develop within their own chorion (2), trichorionic (3), and quadrachorionic (4) | Select one only<br>1. 1 chorion<br>2. 2 chorion<br>3. 3 chorion<br>4. 4 chorion<br>5. Unknown                                                        | Marker of high risk pregnancy                                                                                                                                                                                         | The nature of the chorion from which individuals are derived e.g., within the same chorion (monochorionic or 1), dichorionic twins develop within their own chorion (2), trichorionic (3), and quadrachorionic (4) |



| Data Element                                                                                                             | Definition                                                                      | Data Type and Value                                                                                                                                                                                                                                                                                                                                     | Justification                                                                        | Field Level Help                                                                                                                                                                         |
|--------------------------------------------------------------------------------------------------------------------------|---------------------------------------------------------------------------------|---------------------------------------------------------------------------------------------------------------------------------------------------------------------------------------------------------------------------------------------------------------------------------------------------------------------------------------------------------|--------------------------------------------------------------------------------------|------------------------------------------------------------------------------------------------------------------------------------------------------------------------------------------|
| <b>Elective fetal reduction</b>                                                                                          | Elective fetal reduction performed                                              | <ol style="list-style-type: none"> <li>1. No</li> <li>2. 2 to 1</li> <li>3. 3 to 1</li> <li>4. 3 to 2</li> <li>5. 4 to 1</li> <li>6. 4 to 2</li> <li>7. 4 to 3</li> <li>8. 5 to 4</li> <li>9. 5 to 3</li> <li>10. 5 to 2</li> <li>11. 5 to 1</li> <li>12. Reduction done but outcome unknown</li> <li>13. No surviving fetus after reduction</li> </ol> | ART safety monitoring element                                                        | Elective fetal reduction performed                                                                                                                                                       |
| <b>Treatment and pregnancy outcome notes</b>                                                                             | Generic text field to document notes related to treatment and pregnancy outcome | <p>Text</p> <p>For Non-Ontario clinics, no patient identifying information, or parts thereof, can be used</p>                                                                                                                                                                                                                                           | The intent is to use this field for notes related to treatment and pregnancy outcome | <p>Generic text field to document notes related to treatment and pregnancy outcome</p> <p>For Non-Ontario clinics, no patient identifying information, or parts thereof, can be used</p> |
| <b><i>Birth Outcome Tab (some of these data elements are also found under Treatment &amp; Pregnancy Outcome Tab)</i></b> |                                                                                 |                                                                                                                                                                                                                                                                                                                                                         |                                                                                      |                                                                                                                                                                                          |
| <b>Pregnancy/birth outcome</b>                                                                                           | Outcome from the clinical pregnancy                                             | <p>Select one only</p> <ol style="list-style-type: none"> <li>1. Unknown</li> <li>2. Live birth</li> <li>3. Pregnancy loss &lt;20wks</li> <li>4. Pregnancy loss &lt;20wks /termination</li> <li>5. Pregnancy loss &lt;20wks</li> </ol>                                                                                                                  | Effectiveness of treatment                                                           | <p>Outcome from the clinical pregnancy</p> <p>Select one only</p> <p>A delivery with both live born and still born babies is entered</p>                                                 |

| Data Element                   | Definition                                                                              | Data Type and Value                                                                                                                                                                                                                                                                                                                                                                                                                                                                                                                                    | Justification          | Field Level Help                                                                                          |
|--------------------------------|-----------------------------------------------------------------------------------------|--------------------------------------------------------------------------------------------------------------------------------------------------------------------------------------------------------------------------------------------------------------------------------------------------------------------------------------------------------------------------------------------------------------------------------------------------------------------------------------------------------------------------------------------------------|------------------------|-----------------------------------------------------------------------------------------------------------|
|                                |                                                                                         | <p>/spontaneous miscarriage</p> <p>6. Stillbirth at <math>\geq 20</math>wks or <math>\geq 500</math>gms</p> <p>7. Stillbirth at <math>\geq 20</math>wks or <math>\geq 500</math> gms/termination</p> <p>8. Stillbirth at <math>\geq 20</math>wks or <math>\geq 500</math>gms/spontaneous - occurred during antepartum period</p> <p>9. Stillbirth at <math>\geq 20</math>wks or <math>\geq 500</math>gms/spontaneous – occurred during intrapartum period</p> <p>A delivery with both live born and still born babies is entered as a “live birth”</p> |                        | as a “live birth”                                                                                         |
| <b>Estimated date of birth</b> | Estimated date of birth                                                                 | <p>Date</p> <p>This field is automatically calculated as “transfer date” +38 weeks</p>                                                                                                                                                                                                                                                                                                                                                                                                                                                                 |                        | <p>Estimated date of birth</p> <p>This field is automatically calculated as “transfer date” +38 weeks</p> |
| <b>Newborn date of birth</b>   | Newborn date of birth                                                                   | Date                                                                                                                                                                                                                                                                                                                                                                                                                                                                                                                                                   | Link to birth registry | Newborn day/month/year of birth                                                                           |
| <b># babies born</b>           | Number of babies born at 20 weeks + one day or more, including live born and still born | Numeric                                                                                                                                                                                                                                                                                                                                                                                                                                                                                                                                                | Link to birth registry | Number of babies born at 20 weeks + one day or more, including live born and still born                   |
| <b>Gestational age</b>         | Number of weeks and days of gestation                                                   | Numeric                                                                                                                                                                                                                                                                                                                                                                                                                                                                                                                                                | Link to birth registry | # of weeks and days of gestation                                                                          |

| Data Element                      | Definition                                                                                                           | Data Type and Value                                                                                                                                                                                                                                                                                                                                                                                                                                                                                                                                                                                            | Justification                 | Field Level Help                                                                                                   |
|-----------------------------------|----------------------------------------------------------------------------------------------------------------------|----------------------------------------------------------------------------------------------------------------------------------------------------------------------------------------------------------------------------------------------------------------------------------------------------------------------------------------------------------------------------------------------------------------------------------------------------------------------------------------------------------------------------------------------------------------------------------------------------------------|-------------------------------|--------------------------------------------------------------------------------------------------------------------|
| <b>Maternal health conditions</b> | Pre-existing maternal health conditions and/or complications that could impact maternal, pregnancy or birth outcomes | See Appendix A for drop list<br><br>Select all applicable                                                                                                                                                                                                                                                                                                                                                                                                                                                                                                                                                      | ART safety monitoring element | Select ALL maternal health conditions and/or complications that could impact maternal, pregnancy or birth outcomes |
| <b>Complications of pregnancy</b> | Pregnancy related complications during this pregnancy                                                                | Select all applicable<br>1. Fetal   Anomalies<br>2. Fetal   Isoimmunization/Alloimmunization<br>3. Fetal   IUGR<br>4. Fetal   LGA<br>5. Fetal   Oligohydramnios<br>6. Fetal   Polyhydramnios<br>7. Fetal   Other<br>8. Maternal   Anaemia unresponsive to therapy<br>9. Maternal   Antepartum Bleeding ( Persistent and unexplained)<br>10. Maternal   Gestational diabetes<br>11. Maternal   Hyperemesis Gravidarum (Requiring Hospital Admission)<br>12. Maternal   Hypertensive Disorder of pregnancy<br>13. Placental   Placenta Abruption<br>14. Placental   Placenta accrete<br>15. Placental   Placenta | ART safety monitoring element | Pregnancy related complications experienced during this pregnancy<br><br>Select all that apply                     |

| Data Element                  | Definition                                              | Data Type and Value                                                                                                                                                                                                                                                                                                                             | Justification                            | Field Level Help                                        |
|-------------------------------|---------------------------------------------------------|-------------------------------------------------------------------------------------------------------------------------------------------------------------------------------------------------------------------------------------------------------------------------------------------------------------------------------------------------|------------------------------------------|---------------------------------------------------------|
|                               |                                                         | increta<br>16. Placental   Placenta percreta<br>17. Placental   Placenta praevia<br>18. Placental   Other<br>19. Maternal   Preterm labour prior to this admission<br>20. Maternal   Prelabour rupture of membranes (PROM)<br>21. Maternal   Preterm prelabour rupture of membranes (P-PROM)<br>22. Maternal   Other<br>23. None<br>24. Unknown |                                          |                                                         |
| <b>Diabetes and pregnancy</b> | Indicate maternal diabetic status during this pregnancy | 1. None<br>2. Diabetes Complications/ Comorbidities<br>3. Diabetes Complications/ comorbidities   Nephropathy<br>4. Diabetes Complications/ comorbidities   Retinopathy<br>5. Gestational<br>6. Gestational   Insulin<br>7. Gestational   Insulin   ACE inhibitors<br>8. Gestational   Insulin   Statins                                        | Clarify maternal status during pregnancy | Indicate maternal diabetic status during this pregnancy |

| Data Element | Definition | Data Type and Value                                                                                                                                                                                                                                                                                                                                                                                                                                                                                                                                                                                                                                | Justification | Field Level Help |
|--------------|------------|----------------------------------------------------------------------------------------------------------------------------------------------------------------------------------------------------------------------------------------------------------------------------------------------------------------------------------------------------------------------------------------------------------------------------------------------------------------------------------------------------------------------------------------------------------------------------------------------------------------------------------------------------|---------------|------------------|
|              |            | 9. Gestational   Insulin   No<br>Ace Inhibitors or Statins<br>10. Gestational   No Insulin<br>11. Gestational   No Insulin  <br>No Oral agents<br>12. Gestational   No Insulin  <br>Oral Antihyperglycemic<br>Agents<br>13. Gestational   Insulin Status<br>Unknown<br>14. Type I<br>15. Type II<br>16. Type II   Insulin<br>17. Type II   Insulin   ACE<br>inhibitors<br>18. Type II   Insulin   Statins<br>19. Type II   Insulin   No Ace<br>Inhibitors or Statins<br>20. Type II   No Insulin<br>21. Type II   No Insulin   No<br>Oral Agents<br>22. Type II   No Insulin   Oral<br>Antihyperglycemic Agents<br>23. Type Unknown<br>24. Unknown |               |                  |

| Data Element                              | Definition                                                                                                                               | Data Type and Value                                                                                                                                                                                                                                                                                           | Justification                            | Field Level Help                                                                                                                         |
|-------------------------------------------|------------------------------------------------------------------------------------------------------------------------------------------|---------------------------------------------------------------------------------------------------------------------------------------------------------------------------------------------------------------------------------------------------------------------------------------------------------------|------------------------------------------|------------------------------------------------------------------------------------------------------------------------------------------|
| <b>Hypertension disorder in pregnancy</b> | Identification of all hypertensive conditions and the progression of hypertensive conditions the woman experienced during this pregnancy | <ol style="list-style-type: none"> <li>1. None</li> <li>2. Eclampsia</li> <li>3. Gestational Hypertension</li> <li>4. HELLP</li> <li>5. Pre-existing Hypertension with superimposed preeclampsia</li> <li>6. Preeclampsia</li> <li>7. Preeclampsia requiring magnesium sulfate</li> <li>8. Unknown</li> </ol> | Clarify maternal status during pregnancy | Identification of all hypertensive conditions and the progression of hypertensive conditions the woman experienced during this pregnancy |
| <b>Type of labour</b>                     | Indicates whether the labour started spontaneously, was induced mechanically or pharmalogically or did not labour prior to C/Section     | <ol style="list-style-type: none"> <li>1. Induction</li> <li>2. Spontaneous</li> <li>3. None</li> </ol>                                                                                                                                                                                                       |                                          | Indicates whether the labour started spontaneously, was induced mechanically or pharmalogically or did not labour prior to C/Section     |
| <b>Augmentation</b>                       | Interventions used to improve the quality and effectiveness when labour start is spontaneous                                             | <ol style="list-style-type: none"> <li>1. Amniotomy</li> <li>2. None</li> <li>3. Oxytocin</li> <li>4. Prostaglandin</li> <li>5. Unknown</li> </ol>                                                                                                                                                            |                                          | Interventions used to improve the quality and effectiveness when labour start is spontaneous                                             |
| <b>Methods of induction</b>               | Indicates all methods of induction used to initiate and establish effective labour                                                       | <ol style="list-style-type: none"> <li>1. None</li> <li>2. Amniotomy</li> <li>3. Oxytocin</li> <li>4. Prostaglandin</li> <li>5. Sweeping membrane</li> <li>6. Unknown</li> </ol>                                                                                                                              |                                          | Indicates all methods of induction used to initiate and establish effective labour                                                       |
| <b>Type of delivery</b>                   | Indicate how the baby was born                                                                                                           | <ol style="list-style-type: none"> <li>1. Assisted Vaginal</li> <li>2. Induced or Spontaneous Labour Caesarean Section</li> <li>3. No Labour – Caesarean Section</li> </ol>                                                                                                                                   |                                          | Indicate how the baby was born                                                                                                           |

| Data Element                                   | Definition                                                                                  | Data Type and Value                                                                                                                                                                                                                                                                                                                                                                                                                                                                                                                                                                                                                                     | Justification | Field Level Help                                                                            |
|------------------------------------------------|---------------------------------------------------------------------------------------------|---------------------------------------------------------------------------------------------------------------------------------------------------------------------------------------------------------------------------------------------------------------------------------------------------------------------------------------------------------------------------------------------------------------------------------------------------------------------------------------------------------------------------------------------------------------------------------------------------------------------------------------------------------|---------------|---------------------------------------------------------------------------------------------|
|                                                |                                                                                             | 4. Spontaneous Vaginal Birth<br>5. Vaginal                                                                                                                                                                                                                                                                                                                                                                                                                                                                                                                                                                                                              |               |                                                                                             |
| <b>All Indications for induction of labour</b> | All indications for induction of labour<br><br>Induction refers to the initiation of labour | 1. Fetal   Atypical or Abnormal Fetal Surveillance<br>2. Fetal   Fetal anomaly/ies<br>3. Fetal   Isoimmunization/Alloimmunization<br>4. Fetal   IUGR<br>5. Fetal   Macrosomia<br>6. Fetal   Multiple gestation<br>7. Fetal   Other Fetal Complication<br>8. Fetal   Post dates<br>9. Fetal   Termination of Pregnancy<br>10. Fetal   Fetal demise<br>11. Maternal   Diabetes<br>12. Maternal   History of precipitous delivery<br>13. Maternal   Oligohydramnios<br>14. Maternal   Other Obstetrical Complications/Concerns<br>15. Maternal   Polyhydramnios<br>16. Maternal   Pre-existing maternal medical conditions<br>17. Maternal   Preeclampsia/ |               | All indications for induction of labour<br><br>Induction refers to the initiation of labour |

| Data Element                         | Definition                                             | Data Type and Value                                                                                                                                                                                                                                                                                                                                       | Justification | Field Level Help                                       |
|--------------------------------------|--------------------------------------------------------|-----------------------------------------------------------------------------------------------------------------------------------------------------------------------------------------------------------------------------------------------------------------------------------------------------------------------------------------------------------|---------------|--------------------------------------------------------|
|                                      |                                                        | <p>Hypertension</p> <p>18. Maternal   Prelabour rupture of membranes (PROM)</p> <p>19. Maternal   Preterm prelabour rupture of membranes (PPROM)</p> <p>20. Other</p> <p>21. Other   Accommodates Care Provider/Organization</p> <p>22. Other   Distance from birth hospital/Safety precaution</p> <p>23. Other   Maternal Request</p> <p>24. Unknown</p> |               |                                                        |
| <b>Cervical ripening</b>             | Indicate interventions used to ripen cervix for labour | <p>1. None</p> <p>2. Balloon/Mechanical Method (i.e. Foley Catheter)</p> <p>3. Laminaria/artificial tent</p> <p>4. Prostaglandin</p> <p>5. Unknown</p> <p>*: Any existing values of 'Intracervical prostaglandin' and 'Vaginal prostaglandin' will be updated to 'Prostaglandin' for historical purposes</p>                                              |               | Indicate interventions used to ripen cervix for labour |
| <b>All Indications for caesarean</b> | Indicate all medical and non-medical indications for   | <p>1. Fetal   anomaly</p> <p>2. Fetal   Cord prolapse</p>                                                                                                                                                                                                                                                                                                 |               | Indicate all medical and non-medical indications for   |



| Data Element | Definition        | Data Type and Value                                                                                                                                                                                                                                                                                                                                                                                                                                                                                                                                                                                                                                                                                                          | Justification | Field Level Help  |
|--------------|-------------------|------------------------------------------------------------------------------------------------------------------------------------------------------------------------------------------------------------------------------------------------------------------------------------------------------------------------------------------------------------------------------------------------------------------------------------------------------------------------------------------------------------------------------------------------------------------------------------------------------------------------------------------------------------------------------------------------------------------------------|---------------|-------------------|
| section      | caesarean section | 3. Fetal   IUGR<br>4. Fetal   Macrosomia<br>5. Fetal   Malposition/<br>Malpresentation<br>6. Fetal   Atypical or<br>Abnormal Fetal<br>Surveillance<br>7. Fetal   Other Fetal<br>Indication<br>8. Maternal   Failed forceps/<br>vacuum<br>9. Maternal   Failed<br>Induction<br>10. Maternal   HIV – Human<br>Immunodeficiency Virus<br>11. Maternal   Hypertensive<br>disorders of pregnancy –<br>Eclampsia<br>12. Maternal   Hypertensive<br>disorders of pregnancy –<br>HELLP<br>13. Maternal   Hypertensive<br>disorders of pregnancy –<br>Preeclampsia<br>14. Maternal   Multiple<br>gestation<br>15. Maternal  <br>Nonprogressive first stage<br>of labour<br>16. Maternal  <br>Nonprogressive second<br>stage of labour |               | caesarean section |

| Data Element | Definition | Data Type and Value                                                                                                                                                                                                                                                                                                                                                                                                                                                                                                                                                                                                                                                                    | Justification | Field Level Help |
|--------------|------------|----------------------------------------------------------------------------------------------------------------------------------------------------------------------------------------------------------------------------------------------------------------------------------------------------------------------------------------------------------------------------------------------------------------------------------------------------------------------------------------------------------------------------------------------------------------------------------------------------------------------------------------------------------------------------------------|---------------|------------------|
|              |            | 17. Maternal   Obesity<br>18. Maternal   Placenta praevia<br>19. Maternal   Placental abruption<br>20. Maternal   Maternal Health Condition(s)<br>21. Maternal   Previous C/Section<br>22. Maternal   Suspected chorioamnionitis<br>23. Maternal   VBAC – Failed attempt<br>24. Maternal   VBAC – Failed attempt<br>25. Maternal   VBAC – Not eligible<br>26. Maternal   Uterine rupture<br>27. Maternal   VBAC- Declined VBAC<br>28. Maternal   Other Obstetrical Complication<br>29. Maternal   Previous uterine rupture<br>30. Maternal   Prelabour Rupture of Membranes (PROM) in women with planned C/Section<br>31. Maternal   Preterm prelabour rupture of membranes (PPROM) in |               |                  |

| Data Element                          | Definition                                                          | Data Type and Value                                                                                                                                                                                                                                                                                                                                                                                                                                                                                   | Justification | Field Level Help                                                    |
|---------------------------------------|---------------------------------------------------------------------|-------------------------------------------------------------------------------------------------------------------------------------------------------------------------------------------------------------------------------------------------------------------------------------------------------------------------------------------------------------------------------------------------------------------------------------------------------------------------------------------------------|---------------|---------------------------------------------------------------------|
|                                       |                                                                     | women with planned C/Section<br>32. Maternal   Herpes Simplex Virus<br>33. Other<br>34. Other   Accommodates Care Provider/Organization<br>35. Other   Maternal Request<br>36. Unknown                                                                                                                                                                                                                                                                                                                |               |                                                                     |
| <b>Labour and birth complications</b> | Indicate all intrapartum complications during this labour and birth | 1. Atypical or abnormal fetal surveillance<br>2. Cord prolapse<br>3. Fever >38.5 C<br>4. Hysterectomy<br>5. Meconium<br>6. None<br>7. Nonprogressive first stage of labour<br>8. Nonprogressive labour / lack of descent / dystocia<br>9. Nonprogressive second stage of labour<br>10. Perineal Hematoma<br>11. Placental Abruptio<br>12. Postpartum haemorrhage<br>13. Pulmonary Embolism<br>14. Retained Placenta Manual Removal<br>15. Retained Placenta Surgical Removal<br>16. Shoulder dystocia |               | Indicate all intrapartum complications during this labour and birth |

| Data Element            | Definition                          | Data Type and Value                                                                                                                                                                                                                                                                                                                                                                                                                                                                                 | Justification                | Field Level Help                    |
|-------------------------|-------------------------------------|-----------------------------------------------------------------------------------------------------------------------------------------------------------------------------------------------------------------------------------------------------------------------------------------------------------------------------------------------------------------------------------------------------------------------------------------------------------------------------------------------------|------------------------------|-------------------------------------|
|                         |                                     | <ul style="list-style-type: none"> <li>17. Unknown</li> <li>18. Uterine Atony</li> <li>19. Uterine dehiscence</li> <li>20. Uterine rupture</li> <li>21. Other</li> </ul>                                                                                                                                                                                                                                                                                                                            |                              |                                     |
| <b>Maternal outcome</b> | Maternal disposition                | <ul style="list-style-type: none"> <li>1. Maternal Death – Not related to Pregnancy or Birth</li> <li>2. Maternal Death – Related to Pregnancy or Birth</li> <li>3. No Transfer</li> <li>4. Transfer to ICU/CCU</li> <li>5. Transfer to other non-obstetrical unit same hospital</li> <li>6. Transfer to other hospital</li> </ul>                                                                                                                                                                  |                              | Maternal disposition                |
| <b>Birth outcome</b>    | Outcome from the clinical pregnancy | <ul style="list-style-type: none"> <li>1. Unknown</li> <li>2. Live birth</li> <li>3. Stillbirth at <math>\geq 20</math>wks or <math>\geq 500</math>gms</li> <li>4. Stillbirth at <math>\geq 20</math>wks or <math>\geq 500</math> gms/intentional</li> <li>5. Stillbirth at <math>\geq 20</math>wks or <math>\geq 500</math>gms/spontaneous during antepartum period</li> <li>6. Stillbirth at <math>\geq 20</math>wks or <math>\geq 500</math>gms/spontaneous during intrapartum period</li> </ul> | Effectiveness of treatment   | Outcome from the clinical pregnancy |
| <b>Sex</b>              | Sex of baby                         | <ul style="list-style-type: none"> <li>1. Female</li> <li>2. Male</li> </ul>                                                                                                                                                                                                                                                                                                                                                                                                                        | Link to other birth outcomes | Sex of baby                         |
| <b>Birth weight</b>     | Birth weight                        | Numeric with decimal (grams)                                                                                                                                                                                                                                                                                                                                                                                                                                                                        | Link to other birth outcomes | Birth weight in grams               |

| Data Element                                             | Definition                                                                                                         | Data Type and Value                                                                                                                                                                                                                                                                                                                                                                                                                                                        | Justification                                                  | Field Level Help                                                                                                   |
|----------------------------------------------------------|--------------------------------------------------------------------------------------------------------------------|----------------------------------------------------------------------------------------------------------------------------------------------------------------------------------------------------------------------------------------------------------------------------------------------------------------------------------------------------------------------------------------------------------------------------------------------------------------------------|----------------------------------------------------------------|--------------------------------------------------------------------------------------------------------------------|
| <b>Congenital anomalies</b>                              | All structural, functional, and genetic anomalies diagnosed in aborted fetuses, at birth or in the neonatal period | Provincial code system<br>See Appendix B for drop list                                                                                                                                                                                                                                                                                                                                                                                                                     | ART safety monitoring element                                  | All structural, functional, and genetic anomalies diagnosed in aborted fetuses, at birth or in the neonatal period |
| <b>Neonatal death</b>                                    | Death of a live born baby within 28 days of birth                                                                  | Yes or no                                                                                                                                                                                                                                                                                                                                                                                                                                                                  | ART safety monitoring element                                  | Death of a live born baby within 28 days of birth                                                                  |
| <b>Apgar 1</b>                                           | APGAR Score at 1 minute                                                                                            | Numeric 1-10 or unknown                                                                                                                                                                                                                                                                                                                                                                                                                                                    |                                                                | APGAR Score at 1 minute                                                                                            |
| <b>Apgar 5</b>                                           | APGAR Score at 2 minutes                                                                                           | Numeric 1-10 or unknown                                                                                                                                                                                                                                                                                                                                                                                                                                                    |                                                                | APGAR Score at 2 minutes                                                                                           |
| <b>Apgar 10</b>                                          | APGAR Score at 10 minutes                                                                                          | Numeric 1-10 or unknown                                                                                                                                                                                                                                                                                                                                                                                                                                                    |                                                                | APGAR Score at 10 minutes                                                                                          |
| <b>Neonatal birth complications</b>                      | Indicate all newborn birth conditions                                                                              | <ol style="list-style-type: none"> <li>1. Birth injury – intracranial hemorrhage</li> <li>2. Birth injury – subarachnoid hemorrhage</li> <li>3. Birth injury – subdural hemorrhage</li> <li>4. Birth injury – unspecified</li> <li>5. Birth injury - other</li> <li>6. Brachial plexus injury</li> <li>7. Caput succedaneum</li> <li>8. Cephalohematoma</li> <li>9. Clavicular fracture</li> <li>10. Facial nerve injury</li> <li>11. None</li> <li>12. Unknown</li> </ol> |                                                                | Indicate all newborn complications and/or conditions                                                               |
| <b>Admission to NICU</b>                                 | Indicate newborn's transfer to the NICU                                                                            | Yes or no                                                                                                                                                                                                                                                                                                                                                                                                                                                                  |                                                                | Indicate newborn's transfer to the NICU                                                                            |
| <b>Same fields are available for baby #2, #3, and #4</b> |                                                                                                                    |                                                                                                                                                                                                                                                                                                                                                                                                                                                                            |                                                                |                                                                                                                    |
| <b>Notes on birth outcome</b>                            | Generic text field to document notes related to the birth                                                          | Text                                                                                                                                                                                                                                                                                                                                                                                                                                                                       | The intent is to use this field for notes related to the birth | Generic text field to document notes related to birth outcome                                                      |

| Data Element | Definition | Data Type and Value                                                                        | Justification | Field Level Help                                                                           |
|--------------|------------|--------------------------------------------------------------------------------------------|---------------|--------------------------------------------------------------------------------------------|
|              | outcome    | For Non-Ontario clinics, no patient identifying information, or parts thereof, can be used | outcome       | For Non-Ontario clinics, no patient identifying information, or parts thereof, can be used |

**Document prepared and maintained by Dr. Marie-Claude Léveillé and Moya Johnson**

**Acknowledgments:**

We thank Drs. Albert Yuzpe, Francois Bissonnette, Sonya Kashyap, Jason Min, David Young, Cliff Librach, Scot Hamilton, as well as Ann Sprague, Simon Phillips, Joanne Gunby, Nicole Hanson and Mari Teitelbaum, for their suggestions and contributions in the development of this document.

The data elements in CARTR Plus are based on the ones previously contained in the Canadian ART Registry-Treatment Outcome Reporting System (CARTR-TORS), as well as on the data elements contained in other national registries including USA (CDC/SART), UK (HFEA), Australia/New Zealand (ANZARD), France, Switzerland (FIVNAT-CH), Belgium (BELRAP), Germany, and the European IVF Monitoring Consortium (EIM). The final data elements were selected for their importance in predicting, monitoring, researching and improving outcomes of assisted reproductive technology procedures in Canada. Data elements monitored by individual laboratories as part of their quality management system were not retained in CARTR Plus.
